# Supplementary material for: Ephemeral grounding on the Pine Island Ice Shelf, West Antarctica, from 2014–2023
Source: Copernicus journal article supplement (doi:10.5194/tc-20-245-2026), 2026-01-15
Supplement: Supplementary file 1 [file Table_S1.xlsx]

## Sheet: Description
The Sentinel-1 file name includes the satellite sensing period.
For example: 20170614T043458_20170614T043525 = yyyymmddThhMMss_yyyymmddThhMMss

## Sheet: 65_908
Sentinel-1 IW Images Path/Frame=65/908, 2015 to 2016
DROT
Offset tracking		Offset tracking
Image 1	Image 2	Image 3	Image 4
S1A_IW_SLC__1SSH_20151122T043521_20151122T043548_008712_00C672_4697-SLC	S1A_IW_SLC__1SSH_20151204T043520_20151204T043548_008887_00CB5C_7FFF-SLC	S1A_IW_SLC__1SSH_20151204T043520_20151204T043548_008887_00CB5C_7FFF-SLC	S1A_IW_SLC__1SSH_20151216T043520_20151216T043548_009062_00D030_2B09-SLC
S1A_IW_SLC__1SSH_20151204T043520_20151204T043548_008887_00CB5C_7FFF-SLC	S1A_IW_SLC__1SSH_20151216T043520_20151216T043548_009062_00D030_2B09-SLC	S1A_IW_SLC__1SSH_20151216T043520_20151216T043548_009062_00D030_2B09-SLC	S1A_IW_SLC__1SSH_20151228T043519_20151228T043547_009237_00D529_F840-SLC
S1A_IW_SLC__1SSH_20151216T043520_20151216T043548_009062_00D030_2B09-SLC	S1A_IW_SLC__1SSH_20151228T043519_20151228T043547_009237_00D529_F840-SLC	S1A_IW_SLC__1SSH_20151228T043519_20151228T043547_009237_00D529_F840-SLC	S1A_IW_SLC__1SSH_20160109T043519_20160109T043547_009412_00DA2B_3CEE-SLC
S1A_IW_SLC__1SSH_20151228T043519_20151228T043547_009237_00D529_F840-SLC	S1A_IW_SLC__1SSH_20160109T043519_20160109T043547_009412_00DA2B_3CEE-SLC	S1A_IW_SLC__1SSH_20160109T043519_20160109T043547_009412_00DA2B_3CEE-SLC	S1A_IW_SLC__1SSH_20160121T043519_20160121T043547_009587_00DF3A_5E52-SLC
S1A_IW_SLC__1SSH_20160109T043519_20160109T043547_009412_00DA2B_3CEE-SLC	S1A_IW_SLC__1SSH_20160121T043519_20160121T043547_009587_00DF3A_5E52-SLC	S1A_IW_SLC__1SSH_20160121T043519_20160121T043547_009587_00DF3A_5E52-SLC	S1A_IW_SLC__1SSH_20160202T043518_20160202T043546_009762_00E456_3462-SLC
S1A_IW_SLC__1SSH_20160121T043519_20160121T043547_009587_00DF3A_5E52-SLC	S1A_IW_SLC__1SSH_20160202T043518_20160202T043546_009762_00E456_3462-SLC	S1A_IW_SLC__1SSH_20160202T043518_20160202T043546_009762_00E456_3462-SLC	S1A_IW_SLC__1SSH_20160214T043518_20160214T043546_009937_00E96B_EFF8-SLC
S1A_IW_SLC__1SSH_20160202T043518_20160202T043546_009762_00E456_3462-SLC	S1A_IW_SLC__1SSH_20160214T043518_20160214T043546_009937_00E96B_EFF8-SLC	S1A_IW_SLC__1SSH_20160214T043518_20160214T043546_009937_00E96B_EFF8-SLC	S1A_IW_SLC__1SSH_20160226T043518_20160226T043546_010112_00EE8B_82E6-SLC
S1A_IW_SLC__1SSH_20160214T043518_20160214T043546_009937_00E96B_EFF8-SLC	S1A_IW_SLC__1SSH_20160226T043518_20160226T043546_010112_00EE8B_82E6-SLC	S1A_IW_SLC__1SSH_20160226T043518_20160226T043546_010112_00EE8B_82E6-SLC	S1A_IW_SLC__1SSH_20160309T043518_20160309T043546_010287_00F37C_1170-SLC
S1A_IW_SLC__1SSH_20160226T043518_20160226T043546_010112_00EE8B_82E6-SLC	S1A_IW_SLC__1SSH_20160309T043518_20160309T043546_010287_00F37C_1170-SLC	S1A_IW_SLC__1SSH_20160309T043518_20160309T043546_010287_00F37C_1170-SLC	S1A_IW_SLC__1SSH_20160321T043519_20160321T043546_010462_00F871_0676-SLC
S1A_IW_SLC__1SSH_20160309T043518_20160309T043546_010287_00F37C_1170-SLC	S1A_IW_SLC__1SSH_20160321T043519_20160321T043546_010462_00F871_0676-SLC	S1A_IW_SLC__1SSH_20160321T043519_20160321T043546_010462_00F871_0676-SLC	S1A_IW_SLC__1SSH_20160402T043519_20160402T043547_010637_00FD74_AA0E-SLC
S1A_IW_SLC__1SSH_20160321T043519_20160321T043546_010462_00F871_0676-SLC	S1A_IW_SLC__1SSH_20160402T043519_20160402T043547_010637_00FD74_AA0E-SLC	S1A_IW_SLC__1SSH_20160402T043519_20160402T043547_010637_00FD74_AA0E-SLC	S1A_IW_SLC__1SSH_20160414T043519_20160414T043547_010812_0102BA_785E-SLC
S1A_IW_SLC__1SSH_20160402T043519_20160402T043547_010637_00FD74_AA0E-SLC	S1A_IW_SLC__1SSH_20160414T043519_20160414T043547_010812_0102BA_785E-SLC	S1A_IW_SLC__1SSH_20160414T043519_20160414T043547_010812_0102BA_785E-SLC	S1A_IW_SLC__1SSH_20160426T043520_20160426T043548_010987_010817_DDE7-SLC
S1A_IW_SLC__1SSH_20160414T043519_20160414T043547_010812_0102BA_785E-SLC	S1A_IW_SLC__1SSH_20160426T043520_20160426T043548_010987_010817_DDE7-SLC	S1A_IW_SLC__1SSH_20160426T043520_20160426T043548_010987_010817_DDE7-SLC	S1A_IW_SLC__1SSH_20160508T043521_20160508T043548_011162_010DA2_603C-SLC
S1A_IW_SLC__1SSH_20160426T043520_20160426T043548_010987_010817_DDE7-SLC	S1A_IW_SLC__1SSH_20160508T043521_20160508T043548_011162_010DA2_603C-SLC	S1A_IW_SLC__1SSH_20160508T043521_20160508T043548_011162_010DA2_603C-SLC	S1A_IW_SLC__1SSH_20160601T043522_20160601T043550_011512_011902_5A01-SLC
S1A_IW_SLC__1SSH_20160508T043521_20160508T043548_011162_010DA2_603C-SLC	S1A_IW_SLC__1SSH_20160601T043522_20160601T043550_011512_011902_5A01-SLC	S1A_IW_SLC__1SSH_20160601T043522_20160601T043550_011512_011902_5A01-SLC	S1A_IW_SLC__1SSH_20160613T043523_20160613T043550_011687_011E78_CF6B-SLC
S1A_IW_SLC__1SSH_20160601T043522_20160601T043550_011512_011902_5A01-SLC	S1A_IW_SLC__1SSH_20160613T043523_20160613T043550_011687_011E78_CF6B-SLC	S1A_IW_SLC__1SSH_20160613T043523_20160613T043550_011687_011E78_CF6B-SLC	S1A_IW_SLC__1SSH_20160707T043524_20160707T043552_012037_0129A6_1F59
S1A_IW_SLC__1SSH_20160613T043523_20160613T043550_011687_011E78_CF6B-SLC	S1A_IW_SLC__1SSH_20160707T043524_20160707T043552_012037_0129A6_1F59	S1A_IW_SLC__1SSH_20160719T043527_20160719T043555_012212_012F59_B0B9-SLC	S1A_IW_SLC__1SSH_20160731T043528_20160731T043556_012387_013513_EFC5-SLC

## Sheet: 65_909
Sentinel-1 IW Images Path/Frame=65/909, 2014 to 2017
DROT
Offset tracking		Offset tracking
Image 1	Image 2	Image 3	Image 4
S1A_IW_SLC__1SSH_20141010T043520_20141010T043548_002762_0031AF_0EAC-SLC	S1A_IW_SLC__1SSH_20141022T043520_20141022T043548_002937_00355B_F4FA-SLC	S1A_IW_SLC__1SSH_20141022T043520_20141022T043548_002937_00355B_F4FA-SLC	S1A_IW_SLC__1SSH_20141103T043520_20141103T043548_003112_003923_177F-SLC
S1A_IW_SLC__1SSH_20141022T043520_20141022T043548_002937_00355B_F4FA-SLC	S1A_IW_SLC__1SSH_20141103T043520_20141103T043548_003112_003923_177F-SLC	S1A_IW_SLC__1SSH_20141103T043520_20141103T043548_003112_003923_177F-SLC	S1A_IW_SLC__1SSH_20141115T043520_20141115T043547_003287_003CEA_8EA9-SLC
S1A_IW_SLC__1SSH_20141103T043520_20141103T043548_003112_003923_177F-SLC	S1A_IW_SLC__1SSH_20141115T043520_20141115T043547_003287_003CEA_8EA9-SLC	S1A_IW_SLC__1SSH_20141115T043520_20141115T043547_003287_003CEA_8EA9-SLC	S1A_IW_SLC__1SSH_20141127T043519_20141127T043547_003462_0040E0_3A28-SLC
S1A_IW_SLC__1SSH_20141115T043520_20141115T043547_003287_003CEA_8EA9-SLC	S1A_IW_SLC__1SSH_20141127T043519_20141127T043547_003462_0040E0_3A28-SLC	S1A_IW_SLC__1SSH_20141127T043519_20141127T043547_003462_0040E0_3A28-SLC	S1A_IW_SLC__1SSH_20141209T043519_20141209T043547_003637_0044F1_F775-SLC
S1A_IW_SLC__1SSH_20141127T043519_20141127T043547_003462_0040E0_3A28-SLC	S1A_IW_SLC__1SSH_20141209T043519_20141209T043547_003637_0044F1_F775-SLC	S1A_IW_SLC__1SSH_20141209T043519_20141209T043547_003637_0044F1_F775-SLC	S1A_IW_SLC__1SSH_20141221T043519_20141221T043546_003812_0048E9_B550-SLC
S1A_IW_SLC__1SSH_20141209T043519_20141209T043547_003637_0044F1_F775-SLC	S1A_IW_SLC__1SSH_20141221T043519_20141221T043546_003812_0048E9_B550-SLC	S1A_IW_SLC__1SSH_20141221T043519_20141221T043546_003812_0048E9_B550-SLC	S1A_IW_SLC__1SSH_20150102T043519_20150102T043546_003987_004CD3_713B-SLC
S1A_IW_SLC__1SSH_20141221T043519_20141221T043546_003812_0048E9_B550-SLC	S1A_IW_SLC__1SSH_20150102T043519_20150102T043546_003987_004CD3_713B-SLC	S1A_IW_SLC__1SSH_20150102T043519_20150102T043546_003987_004CD3_713B-SLC	S1A_IW_SLC__1SSH_20150114T043518_20150114T043545_004162_0050C4_37BF-SLC
S1A_IW_SLC__1SSH_20150102T043519_20150102T043546_003987_004CD3_713B-SLC	S1A_IW_SLC__1SSH_20150114T043518_20150114T043545_004162_0050C4_37BF-SLC	S1A_IW_SLC__1SSH_20150114T043518_20150114T043545_004162_0050C4_37BF-SLC	S1A_IW_SLC__1SSH_20150126T043518_20150126T043545_004337_0054A5_C081-SLC
S1A_IW_SLC__1SSH_20150114T043518_20150114T043545_004162_0050C4_37BF-SLC	S1A_IW_SLC__1SSH_20150126T043518_20150126T043545_004337_0054A5_C081-SLC	S1A_IW_SLC__1SSH_20150126T043518_20150126T043545_004337_0054A5_C081-SLC	S1A_IW_SLC__1SSH_20150207T043517_20150207T043545_004512_0058A1_5EF5-SLC
S1A_IW_SLC__1SSH_20150126T043518_20150126T043545_004337_0054A5_C081-SLC	S1A_IW_SLC__1SSH_20150207T043517_20150207T043545_004512_0058A1_5EF5-SLC	S1A_IW_SLC__1SSH_20150207T043517_20150207T043545_004512_0058A1_5EF5-SLC	S1A_IW_SLC__1SSH_20150219T043517_20150219T043545_004687_005CB0_7F28-SLC
S1A_IW_SLC__1SSH_20150207T043517_20150207T043545_004512_0058A1_5EF5-SLC	S1A_IW_SLC__1SSH_20150219T043517_20150219T043545_004687_005CB0_7F28-SLC	S1A_IW_SLC__1SSH_20150219T043517_20150219T043545_004687_005CB0_7F28-SLC	S1A_IW_SLC__1SSH_20150303T043517_20150303T043545_004862_0060F2_3D1F-SLC
S1A_IW_SLC__1SSH_20150219T043517_20150219T043545_004687_005CB0_7F28-SLC	S1A_IW_SLC__1SSH_20150303T043517_20150303T043545_004862_0060F2_3D1F-SLC	S1A_IW_SLC__1SSH_20150303T043517_20150303T043545_004862_0060F2_3D1F-SLC	S1A_IW_SLC__1SSH_20150315T043518_20150315T043545_005037_006525_343C-SLC
S1A_IW_SLC__1SSH_20150303T043517_20150303T043545_004862_0060F2_3D1F-SLC	S1A_IW_SLC__1SSH_20150315T043518_20150315T043545_005037_006525_343C-SLC	S1A_IW_SLC__1SSH_20150315T043518_20150315T043545_005037_006525_343C-SLC	S1A_IW_SLC__1SSH_20150327T043518_20150327T043545_005212_006956_3BE2-SLC
S1A_IW_SLC__1SSH_20150315T043518_20150315T043545_005037_006525_343C-SLC	S1A_IW_SLC__1SSH_20150327T043518_20150327T043545_005212_006956_3BE2-SLC	S1A_IW_SLC__1SSH_20150327T043518_20150327T043545_005212_006956_3BE2-SLC	S1A_IW_SLC__1SSH_20150408T043518_20150408T043545_005387_006D8A_008D-SLC
S1A_IW_SLC__1SSH_20150327T043518_20150327T043545_005212_006956_3BE2-SLC	S1A_IW_SLC__1SSH_20150408T043518_20150408T043545_005387_006D8A_008D-SLC	S1A_IW_SLC__1SSH_20150408T043518_20150408T043545_005387_006D8A_008D-SLC	S1A_IW_SLC__1SSH_20150420T043519_20150420T043546_005562_0071E3_6469-SLC
S1A_IW_SLC__1SSH_20150408T043518_20150408T043545_005387_006D8A_008D-SLC	S1A_IW_SLC__1SSH_20150420T043519_20150420T043546_005562_0071E3_6469-SLC	S1A_IW_SLC__1SSH_20150420T043519_20150420T043546_005562_0071E3_6469-SLC	S1A_IW_SLC__1SSH_20150502T043520_20150502T043547_005737_0075DF_47E1-SLC
S1A_IW_SLC__1SSH_20150420T043519_20150420T043546_005562_0071E3_6469-SLC	S1A_IW_SLC__1SSH_20150502T043520_20150502T043547_005737_0075DF_47E1-SLC	S1A_IW_SLC__1SSH_20150502T043520_20150502T043547_005737_0075DF_47E1-SLC	S1A_IW_SLC__1SSH_20150514T043520_20150514T043547_005912_0079E2_4660-SLC
S1A_IW_SLC__1SSH_20150502T043520_20150502T043547_005737_0075DF_47E1-SLC	S1A_IW_SLC__1SSH_20150514T043520_20150514T043547_005912_0079E2_4660-SLC	S1A_IW_SLC__1SSH_20150713T043523_20150713T043550_006787_0091F9_F619-SLC	S1A_IW_SLC__1SSH_20150725T043524_20150725T043551_006962_0096F9_E48E-SLC
S1A_IW_SLC__1SSH_20150713T043523_20150713T043550_006787_0091F9_F619-SLC	S1A_IW_SLC__1SSH_20150725T043524_20150725T043551_006962_0096F9_E48E-SLC	S1A_IW_SLC__1SSH_20150725T043524_20150725T043551_006962_0096F9_E48E-SLC	S1A_IW_SLC__1SSH_20150806T043524_20150806T043552_007137_009BCD_A406-SLC
S1A_IW_SLC__1SSH_20150725T043524_20150725T043551_006962_0096F9_E48E-SLC	S1A_IW_SLC__1SSH_20150806T043524_20150806T043552_007137_009BCD_A406-SLC	S1A_IW_SLC__1SSH_20150806T043524_20150806T043552_007137_009BCD_A406-SLC	S1A_IW_SLC__1SSH_20150818T043525_20150818T043552_007312_00A091_677F-SLC
S1A_IW_SLC__1SSH_20150806T043524_20150806T043552_007137_009BCD_A406-SLC	S1A_IW_SLC__1SSH_20150818T043525_20150818T043552_007312_00A091_677F-SLC	S1A_IW_SLC__1SSH_20150818T043525_20150818T043552_007312_00A091_677F-SLC	S1A_IW_SLC__1SSH_20150830T043526_20150830T043553_007487_00A556_A22C-SLC
S1A_IW_SLC__1SSH_20150818T043525_20150818T043552_007312_00A091_677F-SLC	S1A_IW_SLC__1SSH_20150830T043526_20150830T043553_007487_00A556_A22C-SLC	S1A_IW_SLC__1SSH_20150830T043526_20150830T043553_007487_00A556_A22C-SLC	S1A_IW_SLC__1SSH_20150911T043526_20150911T043553_007662_00AA20_997F-SLC
S1A_IW_SLC__1SSH_20150830T043526_20150830T043553_007487_00A556_A22C-SLC	S1A_IW_SLC__1SSH_20150911T043526_20150911T043553_007662_00AA20_997F-SLC	S1A_IW_SLC__1SSH_20150911T043526_20150911T043553_007662_00AA20_997F-SLC	S1A_IW_SLC__1SSH_20150923T043526_20150923T043553_007837_00AEB7_03C1-SLC
S1A_IW_SLC__1SSH_20150911T043526_20150911T043553_007662_00AA20_997F-SLC	S1A_IW_SLC__1SSH_20150923T043526_20150923T043553_007837_00AEB7_03C1-SLC	S1A_IW_SLC__1SSH_20150923T043526_20150923T043553_007837_00AEB7_03C1-SLC	S1A_IW_SLC__1SSH_20151005T043527_20151005T043554_008012_00B370_BE8A-SLC
S1A_IW_SLC__1SSH_20150923T043526_20150923T043553_007837_00AEB7_03C1-SLC	S1A_IW_SLC__1SSH_20151005T043527_20151005T043554_008012_00B370_BE8A-SLC	S1A_IW_SLC__1SSH_20151005T043527_20151005T043554_008012_00B370_BE8A-SLC	S1A_IW_SLC__1SSH_20151017T043527_20151017T043554_008187_00B827_C0B9-SLC
S1A_IW_SLC__1SSH_20151005T043527_20151005T043554_008012_00B370_BE8A-SLC	S1A_IW_SLC__1SSH_20151017T043527_20151017T043554_008187_00B827_C0B9-SLC	S1A_IW_SLC__1SSH_20151017T043527_20151017T043554_008187_00B827_C0B9-SLC	S1A_IW_SLC__1SSH_20151029T043526_20151029T043554_008362_00BCE0_E90C-SLC
S1A_IW_SLC__1SSH_20151017T043527_20151017T043554_008187_00B827_C0B9-SLC	S1A_IW_SLC__1SSH_20151029T043526_20151029T043554_008362_00BCE0_E90C-SLC	S1A_IW_SLC__1SSH_20151029T043526_20151029T043554_008362_00BCE0_E90C-SLC	S1A_IW_SLC__1SSH_20151110T043526_20151110T043553_008537_00C17B_2E7F-SLC
S1A_IW_SLC__1SSH_20151029T043526_20151029T043554_008362_00BCE0_E90C-SLC	S1A_IW_SLC__1SSH_20151110T043526_20151110T043553_008537_00C17B_2E7F-SLC	S1A_IW_SLC__1SSH_20151122T043521_20151122T043548_008712_00C672_4697-SLC	S1A_IW_SLC__1SSH_20151204T043520_20151204T043548_008887_00CB5C_7FFF-SLC
S1A_IW_SLC__1SSH_20160719T043527_20160719T043555_012212_012F59_B0B9-SLC	S1A_IW_SLC__1SSH_20160731T043528_20160731T043556_012387_013513_EFC5-SLC	S1A_IW_SLC__1SSH_20160731T043528_20160731T043556_012387_013513_EFC5-SLC	S1A_IW_SLC__1SSH_20160812T043529_20160812T043556_012562_013AE9_4AC7-SLC
S1A_IW_SLC__1SSH_20160731T043528_20160731T043556_012387_013513_EFC5-SLC	S1A_IW_SLC__1SSH_20160812T043529_20160812T043556_012562_013AE9_4AC7-SLC	S1A_IW_SLC__1SSH_20160812T043529_20160812T043556_012562_013AE9_4AC7-SLC	S1A_IW_SLC__1SSH_20160824T043529_20160824T043557_012737_0140C1_7173-SLC
S1A_IW_SLC__1SSH_20160812T043529_20160812T043556_012562_013AE9_4AC7-SLC	S1A_IW_SLC__1SSH_20160824T043529_20160824T043557_012737_0140C1_7173-SLC	S1A_IW_SLC__1SSH_20160824T043529_20160824T043557_012737_0140C1_7173-SLC	S1A_IW_SLC__1SSH_20160905T043530_20160905T043558_012912_01469A_C136-SLC
S1A_IW_SLC__1SSH_20160824T043529_20160824T043557_012737_0140C1_7173-SLC	S1A_IW_SLC__1SSH_20160905T043530_20160905T043558_012912_01469A_C136-SLC	S1A_IW_SLC__1SSH_20160905T043530_20160905T043558_012912_01469A_C136-SLC	S1A_IW_SLC__1SSH_20160917T043530_20160917T043558_013087_014C3F_135A-SLC
S1A_IW_SLC__1SSH_20160905T043530_20160905T043558_012912_01469A_C136-SLC	S1A_IW_SLC__1SSH_20160917T043530_20160917T043558_013087_014C3F_135A-SLC	S1A_IW_SLC__1SSH_20160917T043530_20160917T043558_013087_014C3F_135A-SLC	S1A_IW_SLC__1SSH_20160929T043531_20160929T043558_013262_0151F6_EE69-SLC
S1A_IW_SLC__1SSH_20160917T043530_20160917T043558_013087_014C3F_135A-SLC	S1A_IW_SLC__1SSH_20160929T043531_20160929T043558_013262_0151F6_EE69-SLC	S1A_IW_SLC__1SSH_20160929T043531_20160929T043558_013262_0151F6_EE69-SLC	S1B_IW_SLC__1SSH_20161005T043448_20161005T043516_002366_004001_E90E-SLC
S1A_IW_SLC__1SSH_20160929T043531_20160929T043558_013262_0151F6_EE69-SLC	S1B_IW_SLC__1SSH_20161005T043448_20161005T043516_002366_004001_E90E-SLC	S1B_IW_SLC__1SSH_20161005T043448_20161005T043516_002366_004001_E90E-SLC	S1A_IW_SLC__1SSH_20161011T043530_20161011T043558_013437_01577B_EE30-SLC
S1B_IW_SLC__1SSH_20161005T043448_20161005T043516_002366_004001_E90E-SLC	S1A_IW_SLC__1SSH_20161011T043530_20161011T043558_013437_01577B_EE30-SLC	S1A_IW_SLC__1SSH_20161011T043530_20161011T043558_013437_01577B_EE30-SLC	S1B_IW_SLC__1SSH_20161017T043448_20161017T043516_002541_0044B0_623E-SLC
S1A_IW_SLC__1SSH_20161011T043530_20161011T043558_013437_01577B_EE30-SLC	S1B_IW_SLC__1SSH_20161017T043448_20161017T043516_002541_0044B0_623E-SLC	S1B_IW_SLC__1SSH_20161017T043448_20161017T043516_002541_0044B0_623E-SLC	S1A_IW_SLC__1SSH_20161023T043530_20161023T043558_013612_015CFB_DC25-SLC
S1B_IW_SLC__1SSH_20161017T043448_20161017T043516_002541_0044B0_623E-SLC	S1A_IW_SLC__1SSH_20161023T043530_20161023T043558_013612_015CFB_DC25-SLC	S1A_IW_SLC__1SSH_20161023T043530_20161023T043558_013612_015CFB_DC25-SLC	S1B_IW_SLC__1SSH_20161029T043449_20161029T043516_002716_004999_8DCF-SLC
S1A_IW_SLC__1SSH_20161023T043530_20161023T043558_013612_015CFB_DC25-SLC	S1B_IW_SLC__1SSH_20161029T043449_20161029T043516_002716_004999_8DCF-SLC	S1B_IW_SLC__1SSH_20161029T043449_20161029T043516_002716_004999_8DCF-SLC	S1A_IW_SLC__1SSH_20161104T043530_20161104T043558_013787_01626D_BF72-SLC
S1B_IW_SLC__1SSH_20161029T043449_20161029T043516_002716_004999_8DCF-SLC	S1A_IW_SLC__1SSH_20161104T043530_20161104T043558_013787_01626D_BF72-SLC	S1A_IW_SLC__1SSH_20161104T043530_20161104T043558_013787_01626D_BF72-SLC	S1B_IW_SLC__1SSH_20161110T043448_20161110T043516_002891_004E7E_D630-SLC
S1A_IW_SLC__1SSH_20161104T043530_20161104T043558_013787_01626D_BF72-SLC	S1B_IW_SLC__1SSH_20161110T043448_20161110T043516_002891_004E7E_D630-SLC	S1B_IW_SLC__1SSH_20161110T043448_20161110T043516_002891_004E7E_D630-SLC	S1A_IW_SLC__1SSH_20161116T043530_20161116T043558_013962_0167E2_DC3C-SLC
S1B_IW_SLC__1SSH_20161110T043448_20161110T043516_002891_004E7E_D630-SLC	S1A_IW_SLC__1SSH_20161116T043530_20161116T043558_013962_0167E2_DC3C-SLC	S1A_IW_SLC__1SSH_20161116T043530_20161116T043558_013962_0167E2_DC3C-SLC	S1B_IW_SLC__1SSH_20161122T043448_20161122T043516_003066_005371_D522-SLC
S1A_IW_SLC__1SSH_20161116T043530_20161116T043558_013962_0167E2_DC3C-SLC	S1B_IW_SLC__1SSH_20161122T043448_20161122T043516_003066_005371_D522-SLC	S1B_IW_SLC__1SSH_20161122T043448_20161122T043516_003066_005371_D522-SLC	S1A_IW_SLC__1SSH_20161128T043530_20161128T043558_014137_016D3B_60C6-SLC
S1B_IW_SLC__1SSH_20161122T043448_20161122T043516_003066_005371_D522-SLC	S1A_IW_SLC__1SSH_20161128T043530_20161128T043558_014137_016D3B_60C6-SLC	S1A_IW_SLC__1SSH_20161128T043530_20161128T043558_014137_016D3B_60C6-SLC	S1B_IW_SLC__1SSH_20161204T043448_20161204T043516_003241_005862_2BA5-SLC
S1A_IW_SLC__1SSH_20161128T043530_20161128T043558_014137_016D3B_60C6-SLC	S1B_IW_SLC__1SSH_20161204T043448_20161204T043516_003241_005862_2BA5-SLC	S1B_IW_SLC__1SSH_20161204T043448_20161204T043516_003241_005862_2BA5-SLC	S1A_IW_SLC__1SSH_20161210T043530_20161210T043558_014312_0172C9_4BFA-SLC
S1B_IW_SLC__1SSH_20161204T043448_20161204T043516_003241_005862_2BA5-SLC	S1A_IW_SLC__1SSH_20161210T043530_20161210T043558_014312_0172C9_4BFA-SLC	S1A_IW_SLC__1SSH_20161210T043530_20161210T043558_014312_0172C9_4BFA-SLC	S1B_IW_SLC__1SSH_20161216T043447_20161216T043515_003416_005D62_71A2-SLC
S1A_IW_SLC__1SSH_20161210T043530_20161210T043558_014312_0172C9_4BFA-SLC	S1B_IW_SLC__1SSH_20161216T043447_20161216T043515_003416_005D62_71A2-SLC	S1B_IW_SLC__1SSH_20161216T043447_20161216T043515_003416_005D62_71A2-SLC	S1A_IW_SLC__1SSH_20161222T043529_20161222T043557_014487_01783F_7EA1-SLC
S1B_IW_SLC__1SSH_20161216T043447_20161216T043515_003416_005D62_71A2-SLC	S1A_IW_SLC__1SSH_20161222T043529_20161222T043557_014487_01783F_7EA1-SLC	S1A_IW_SLC__1SSH_20161222T043529_20161222T043557_014487_01783F_7EA1-SLC	S1B_IW_SLC__1SSH_20161228T043447_20161228T043515_003591_006268_FE17-SLC
S1A_IW_SLC__1SSH_20161222T043529_20161222T043557_014487_01783F_7EA1-SLC	S1B_IW_SLC__1SSH_20161228T043447_20161228T043515_003591_006268_FE17-SLC	S1B_IW_SLC__1SSH_20161228T043447_20161228T043515_003591_006268_FE17-SLC	S1A_IW_SLC__1SSH_20170103T043528_20170103T043556_014662_017DA0_F05D-SLC
S1B_IW_SLC__1SSH_20161228T043447_20161228T043515_003591_006268_FE17-SLC	S1A_IW_SLC__1SSH_20170103T043528_20170103T043556_014662_017DA0_F05D-SLC	S1A_IW_SLC__1SSH_20170103T043528_20170103T043556_014662_017DA0_F05D-SLC	S1B_IW_SLC__1SSH_20170109T043446_20170109T043513_003766_006795_F96D-SLC
S1A_IW_SLC__1SSH_20170103T043528_20170103T043556_014662_017DA0_F05D-SLC	S1B_IW_SLC__1SSH_20170109T043446_20170109T043513_003766_006795_F96D-SLC	S1B_IW_SLC__1SSH_20170109T043446_20170109T043513_003766_006795_F96D-SLC	S1A_IW_SLC__1SSH_20170115T043527_20170115T043555_014837_0182FB_834C-SLC
S1B_IW_SLC__1SSH_20170109T043446_20170109T043513_003766_006795_F96D-SLC	S1A_IW_SLC__1SSH_20170115T043527_20170115T043555_014837_0182FB_834C-SLC	S1A_IW_SLC__1SSH_20170115T043527_20170115T043555_014837_0182FB_834C-SLC	S1B_IW_SLC__1SSH_20170121T043445_20170121T043513_003941_006CC4_9126-SLC
S1A_IW_SLC__1SSH_20170115T043527_20170115T043555_014837_0182FB_834C-SLC	S1B_IW_SLC__1SSH_20170121T043445_20170121T043513_003941_006CC4_9126-SLC	S1B_IW_SLC__1SSH_20170121T043445_20170121T043513_003941_006CC4_9126-SLC	S1A_IW_SLC__1SSH_20170127T043527_20170127T043555_015012_018860_3B0B-SLC
S1B_IW_SLC__1SSH_20170121T043445_20170121T043513_003941_006CC4_9126-SLC	S1A_IW_SLC__1SSH_20170127T043527_20170127T043555_015012_018860_3B0B-SLC	S1A_IW_SLC__1SSH_20170127T043527_20170127T043555_015012_018860_3B0B-SLC	S1B_IW_SLC__1SSH_20170202T043445_20170202T043513_004116_0071EE_36B1-SLC
S1A_IW_SLC__1SSH_20170127T043527_20170127T043555_015012_018860_3B0B-SLC	S1B_IW_SLC__1SSH_20170202T043445_20170202T043513_004116_0071EE_36B1-SLC	S1B_IW_SLC__1SSH_20170202T043445_20170202T043513_004116_0071EE_36B1-SLC	S1A_IW_SLC__1SSH_20170208T043527_20170208T043555_015187_018DCB_95C5-SLC
S1B_IW_SLC__1SSH_20170202T043445_20170202T043513_004116_0071EE_36B1-SLC	S1A_IW_SLC__1SSH_20170208T043527_20170208T043555_015187_018DCB_95C5-SLC	S1A_IW_SLC__1SSH_20170208T043527_20170208T043555_015187_018DCB_95C5-SLC	S1B_IW_SLC__1SSH_20170214T043445_20170214T043513_004291_00772E_1D16-SLC
S1A_IW_SLC__1SSH_20170208T043527_20170208T043555_015187_018DCB_95C5-SLC	S1B_IW_SLC__1SSH_20170214T043445_20170214T043513_004291_00772E_1D16-SLC	S1B_IW_SLC__1SSH_20170214T043445_20170214T043513_004291_00772E_1D16-SLC	S1A_IW_SLC__1SSH_20170220T043527_20170220T043554_015362_01933D_DE2C-SLC
S1B_IW_SLC__1SSH_20170214T043445_20170214T043513_004291_00772E_1D16-SLC	S1A_IW_SLC__1SSH_20170220T043527_20170220T043554_015362_01933D_DE2C-SLC	S1A_IW_SLC__1SSH_20170220T043527_20170220T043554_015362_01933D_DE2C-SLC	S1B_IW_SLC__1SSH_20170226T043445_20170226T043512_004466_007C63_0C2F-SLC
S1A_IW_SLC__1SSH_20170220T043527_20170220T043554_015362_01933D_DE2C-SLC	S1B_IW_SLC__1SSH_20170226T043445_20170226T043512_004466_007C63_0C2F-SLC	S1B_IW_SLC__1SSH_20170226T043445_20170226T043512_004466_007C63_0C2F-SLC	S1A_IW_SLC__1SSH_20170304T043526_20170304T043554_015537_019887_1670-SLC
S1B_IW_SLC__1SSH_20170226T043445_20170226T043512_004466_007C63_0C2F-SLC	S1A_IW_SLC__1SSH_20170304T043526_20170304T043554_015537_019887_1670-SLC	S1A_IW_SLC__1SSH_20170304T043526_20170304T043554_015537_019887_1670-SLC	S1B_IW_SLC__1SSH_20170310T043445_20170310T043512_004641_008181_FBD8-SLC
S1A_IW_SLC__1SSH_20170304T043526_20170304T043554_015537_019887_1670-SLC	S1B_IW_SLC__1SSH_20170310T043445_20170310T043512_004641_008181_FBD8-SLC	S1B_IW_SLC__1SSH_20170310T043445_20170310T043512_004641_008181_FBD8-SLC	S1A_IW_SLC__1SSH_20170316T043527_20170316T043555_015712_019DC2_11CB-SLC
S1B_IW_SLC__1SSH_20170310T043445_20170310T043512_004641_008181_FBD8-SLC	S1A_IW_SLC__1SSH_20170316T043527_20170316T043555_015712_019DC2_11CB-SLC	S1A_IW_SLC__1SSH_20170316T043527_20170316T043555_015712_019DC2_11CB-SLC	S1A_IW_SLC__1SSH_20170328T043527_20170328T043555_015887_01A300_A422-SLC
S1A_IW_SLC__1SSH_20170316T043527_20170316T043555_015712_019DC2_11CB-SLC	S1A_IW_SLC__1SSH_20170328T043527_20170328T043555_015887_01A300_A422-SLC	S1A_IW_SLC__1SSH_20170328T043527_20170328T043555_015887_01A300_A422-SLC	S1B_IW_SLC__1SSH_20170403T043445_20170403T043513_004991_008BAB_92B7-SLC
S1A_IW_SLC__1SSH_20170328T043527_20170328T043555_015887_01A300_A422-SLC	S1B_IW_SLC__1SSH_20170403T043445_20170403T043513_004991_008BAB_92B7-SLC	S1B_IW_SLC__1SSH_20170403T043445_20170403T043513_004991_008BAB_92B7-SLC	S1A_IW_SLC__1SSH_20170409T043527_20170409T043555_016062_01A83E_519D-SLC
S1B_IW_SLC__1SSH_20170403T043445_20170403T043513_004991_008BAB_92B7-SLC	S1A_IW_SLC__1SSH_20170409T043527_20170409T043555_016062_01A83E_519D-SLC	S1A_IW_SLC__1SSH_20170409T043527_20170409T043555_016062_01A83E_519D-SLC	S1B_IW_SLC__1SSH_20170415T043446_20170415T043514_005166_0090AB_64CB-SLC
S1A_IW_SLC__1SSH_20170409T043527_20170409T043555_016062_01A83E_519D-SLC	S1B_IW_SLC__1SSH_20170415T043446_20170415T043514_005166_0090AB_64CB-SLC	S1B_IW_SLC__1SSH_20170415T043446_20170415T043514_005166_0090AB_64CB-SLC	S1A_IW_SLC__1SSH_20170421T043528_20170421T043556_016237_01AD9A_8908-SLC
S1B_IW_SLC__1SSH_20170415T043446_20170415T043514_005166_0090AB_64CB-SLC	S1A_IW_SLC__1SSH_20170421T043528_20170421T043556_016237_01AD9A_8908-SLC	S1A_IW_SLC__1SSH_20170421T043528_20170421T043556_016237_01AD9A_8908-SLC	S1B_IW_SLC__1SSH_20170427T043446_20170427T043514_005341_0095CE_3075-SLC
S1A_IW_SLC__1SSH_20170421T043528_20170421T043556_016237_01AD9A_8908-SLC	S1B_IW_SLC__1SSH_20170427T043446_20170427T043514_005341_0095CE_3075-SLC	S1B_IW_SLC__1SSH_20170427T043446_20170427T043514_005341_0095CE_3075-SLC	S1A_IW_SLC__1SSH_20170503T043529_20170503T043557_016412_01B2E7_5FB5-SLC
S1B_IW_SLC__1SSH_20170427T043446_20170427T043514_005341_0095CE_3075-SLC	S1A_IW_SLC__1SSH_20170503T043529_20170503T043557_016412_01B2E7_5FB5-SLC	S1A_IW_SLC__1SSH_20170503T043529_20170503T043557_016412_01B2E7_5FB5-SLC	S1B_IW_SLC__1SSH_20170509T043447_20170509T043515_005516_009AA6_053B-SLC
S1A_IW_SLC__1SSH_20170503T043529_20170503T043557_016412_01B2E7_5FB5-SLC	S1B_IW_SLC__1SSH_20170509T043447_20170509T043515_005516_009AA6_053B-SLC	S1B_IW_SLC__1SSH_20170509T043447_20170509T043515_005516_009AA6_053B-SLC	S1A_IW_SLC__1SSH_20170515T043529_20170515T043557_016587_01B839_932C-SLC
S1B_IW_SLC__1SSH_20170509T043447_20170509T043515_005516_009AA6_053B-SLC	S1A_IW_SLC__1SSH_20170515T043529_20170515T043557_016587_01B839_932C-SLC	S1A_IW_SLC__1SSH_20170515T043529_20170515T043557_016587_01B839_932C-SLC	S1B_IW_SLC__1SSH_20170521T043448_20170521T043515_005691_009F8A_7599-SLC
S1A_IW_SLC__1SSH_20170515T043529_20170515T043557_016587_01B839_932C-SLC	S1B_IW_SLC__1SSH_20170521T043448_20170521T043515_005691_009F8A_7599-SLC	S1B_IW_SLC__1SSH_20170521T043448_20170521T043515_005691_009F8A_7599-SLC	S1A_IW_SLC__1SSH_20170527T043530_20170527T043558_016762_01BD9A_69BC-SLC
S1B_IW_SLC__1SSH_20170521T043448_20170521T043515_005691_009F8A_7599-SLC	S1A_IW_SLC__1SSH_20170527T043530_20170527T043558_016762_01BD9A_69BC-SLC	S1A_IW_SLC__1SSH_20170527T043530_20170527T043558_016762_01BD9A_69BC-SLC	S1B_IW_SLC__1SSH_20170602T043448_20170602T043516_005866_00A495_B253-SLC
S1A_IW_SLC__1SSH_20170527T043530_20170527T043558_016762_01BD9A_69BC-SLC	S1B_IW_SLC__1SSH_20170602T043448_20170602T043516_005866_00A495_B253-SLC	S1B_IW_SLC__1SSH_20170602T043448_20170602T043516_005866_00A495_B253-SLC	S1A_IW_SLC__1SSH_20170608T043531_20170608T043559_016937_01C30A_B4BE-SLC
S1B_IW_SLC__1SSH_20170602T043448_20170602T043516_005866_00A495_B253-SLC	S1A_IW_SLC__1SSH_20170608T043531_20170608T043559_016937_01C30A_B4BE-SLC	S1A_IW_SLC__1SSH_20170608T043531_20170608T043559_016937_01C30A_B4BE-SLC	S1A_IW_SLC__1SSH_20170620T043531_20170620T043559_017112_01C871_0D5D-SLC
S1A_IW_SLC__1SSH_20170608T043531_20170608T043559_016937_01C30A_B4BE-SLC	S1A_IW_SLC__1SSH_20170620T043531_20170620T043559_017112_01C871_0D5D-SLC	S1B_IW_SLC__1SSH_20170614T043458_20170614T043525_006041_00A9BA_7769-SLC	S1B_IW_SLC__1SSH_20170626T043459_20170626T043526_006216_00AED1_1991-SLC

## Sheet: 65_910
Sentinel-1 IW Images Path/Frame=65/909, 2014 to 2017.
DROT
Offset tracking		Offset tracking
Image 1	Image 2	Image 3	Image 4
S1B_IW_SLC__1SSH_20170614T043458_20170614T043525_006041_00A9BA_7769-SLC	S1B_IW_SLC__1SSH_20170626T043459_20170626T043526_006216_00AED1_1991-SLC	S1B_IW_SLC__1SSH_20170626T043459_20170626T043526_006216_00AED1_1991-SLC	S1A_IW_SLC__1SSH_20170702T043541_20170702T043608_017287_01CDB5_B08D-SLC
S1B_IW_SLC__1SSH_20170626T043459_20170626T043526_006216_00AED1_1991-SLC	S1A_IW_SLC__1SSH_20170702T043541_20170702T043608_017287_01CDB5_B08D-SLC	S1A_IW_SLC__1SSH_20170702T043541_20170702T043608_017287_01CDB5_B08D-SLC	S1B_IW_SLC__1SSH_20170708T043459_20170708T043526_006391_00B3C4_B3A1-SLC
S1A_IW_SLC__1SSH_20170702T043541_20170702T043608_017287_01CDB5_B08D-SLC	S1B_IW_SLC__1SSH_20170708T043459_20170708T043526_006391_00B3C4_B3A1-SLC	S1B_IW_SLC__1SSH_20170708T043459_20170708T043526_006391_00B3C4_B3A1-SLC	S1A_IW_SLC__1SSH_20170714T043542_20170714T043609_017462_01D2FF_BE95-SLC
S1B_IW_SLC__1SSH_20170708T043459_20170708T043526_006391_00B3C4_B3A1-SLC	S1A_IW_SLC__1SSH_20170714T043542_20170714T043609_017462_01D2FF_BE95-SLC	S1A_IW_SLC__1SSH_20170714T043542_20170714T043609_017462_01D2FF_BE95-SLC	S1B_IW_SLC__1SSH_20170720T043500_20170720T043527_006566_00B8C5_393D-SLC
S1A_IW_SLC__1SSH_20170714T043542_20170714T043609_017462_01D2FF_BE95-SLC	S1B_IW_SLC__1SSH_20170720T043500_20170720T043527_006566_00B8C5_393D-SLC	S1B_IW_SLC__1SSH_20170720T043500_20170720T043527_006566_00B8C5_393D-SLC	S1A_IW_SLC__1SSH_20170726T043543_20170726T043610_017637_01D85A_A009-SLC
S1B_IW_SLC__1SSH_20170720T043500_20170720T043527_006566_00B8C5_393D-SLC	S1A_IW_SLC__1SSH_20170726T043543_20170726T043610_017637_01D85A_A009-SLC	S1A_IW_SLC__1SSH_20170726T043543_20170726T043610_017637_01D85A_A009-SLC	S1B_IW_SLC__1SSH_20170801T043501_20170801T043528_006741_00BDCA_7D08-SLC
S1A_IW_SLC__1SSH_20170726T043543_20170726T043610_017637_01D85A_A009-SLC	S1B_IW_SLC__1SSH_20170801T043501_20170801T043528_006741_00BDCA_7D08-SLC	S1B_IW_SLC__1SSH_20170801T043501_20170801T043528_006741_00BDCA_7D08-SLC	S1A_IW_SLC__1SSH_20170807T043543_20170807T043610_017812_01DDAE_1E86-SLC
S1B_IW_SLC__1SSH_20170801T043501_20170801T043528_006741_00BDCA_7D08-SLC	S1A_IW_SLC__1SSH_20170807T043543_20170807T043610_017812_01DDAE_1E86-SLC	S1A_IW_SLC__1SSH_20170807T043543_20170807T043610_017812_01DDAE_1E86-SLC	S1B_IW_SLC__1SSH_20170813T043501_20170813T043528_006916_00C2E3_6A60-SLC
S1A_IW_SLC__1SSH_20170807T043543_20170807T043610_017812_01DDAE_1E86-SLC	S1B_IW_SLC__1SSH_20170813T043501_20170813T043528_006916_00C2E3_6A60-SLC	S1B_IW_SLC__1SSH_20170813T043501_20170813T043528_006916_00C2E3_6A60-SLC	S1A_IW_SLC__1SSH_20170819T043544_20170819T043611_017987_01E2FD_DB4B-SLC
S1B_IW_SLC__1SSH_20170813T043501_20170813T043528_006916_00C2E3_6A60-SLC	S1A_IW_SLC__1SSH_20170819T043544_20170819T043611_017987_01E2FD_DB4B-SLC	S1A_IW_SLC__1SSH_20170819T043544_20170819T043611_017987_01E2FD_DB4B-SLC	S1B_IW_SLC__1SSH_20170825T043502_20170825T043529_007091_00C7F3_0FCF-SLC
S1A_IW_SLC__1SSH_20170819T043544_20170819T043611_017987_01E2FD_DB4B-SLC	S1B_IW_SLC__1SSH_20170825T043502_20170825T043529_007091_00C7F3_0FCF-SLC	S1B_IW_SLC__1SSH_20170825T043502_20170825T043529_007091_00C7F3_0FCF-SLC	S1A_IW_SLC__1SSH_20170831T043544_20170831T043611_018162_01E840_3788-SLC
S1B_IW_SLC__1SSH_20170825T043502_20170825T043529_007091_00C7F3_0FCF-SLC	S1A_IW_SLC__1SSH_20170831T043544_20170831T043611_018162_01E840_3788-SLC	S1A_IW_SLC__1SSH_20170831T043544_20170831T043611_018162_01E840_3788-SLC	S1B_IW_SLC__1SSH_20170906T043502_20170906T043529_007266_00CD08_6037-SLC
S1A_IW_SLC__1SSH_20170831T043544_20170831T043611_018162_01E840_3788-SLC	S1B_IW_SLC__1SSH_20170906T043502_20170906T043529_007266_00CD08_6037-SLC	S1B_IW_SLC__1SSH_20170906T043502_20170906T043529_007266_00CD08_6037-SLC	S1A_IW_SLC__1SSH_20170912T043545_20170912T043612_018337_01EDBA_6123-SLC
S1B_IW_SLC__1SSH_20170906T043502_20170906T043529_007266_00CD08_6037-SLC	S1A_IW_SLC__1SSH_20170912T043545_20170912T043612_018337_01EDBA_6123-SLC	S1A_IW_SLC__1SSH_20170912T043545_20170912T043612_018337_01EDBA_6123-SLC	S1B_IW_SLC__1SSH_20170918T043503_20170918T043530_007441_00D22D_08AD-SLC
S1A_IW_SLC__1SSH_20170912T043545_20170912T043612_018337_01EDBA_6123-SLC	S1B_IW_SLC__1SSH_20170918T043503_20170918T043530_007441_00D22D_08AD-SLC	S1B_IW_SLC__1SSH_20170918T043503_20170918T043530_007441_00D22D_08AD-SLC	S1A_IW_SLC__1SSH_20170924T043545_20170924T043612_018512_01F318_7CBF-SLC
S1B_IW_SLC__1SSH_20170918T043503_20170918T043530_007441_00D22D_08AD-SLC	S1A_IW_SLC__1SSH_20170924T043545_20170924T043612_018512_01F318_7CBF-SLC	S1A_IW_SLC__1SSH_20170924T043545_20170924T043612_018512_01F318_7CBF-SLC	S1B_IW_SLC__1SSH_20170930T043503_20170930T043530_007616_00D733_9688-SLC
S1A_IW_SLC__1SSH_20170924T043545_20170924T043612_018512_01F318_7CBF-SLC	S1B_IW_SLC__1SSH_20170930T043503_20170930T043530_007616_00D733_9688-SLC	S1B_IW_SLC__1SSH_20170930T043503_20170930T043530_007616_00D733_9688-SLC	S1A_IW_SLC__1SSH_20171006T043545_20171006T043612_018687_01F86C_E4C3-SLC
S1B_IW_SLC__1SSH_20170930T043503_20170930T043530_007616_00D733_9688-SLC	S1A_IW_SLC__1SSH_20171006T043545_20171006T043612_018687_01F86C_E4C3-SLC	S1A_IW_SLC__1SSH_20171006T043545_20171006T043612_018687_01F86C_E4C3-SLC	S1B_IW_SLC__1SSH_20171012T043504_20171012T043531_007791_00DC2F_2A52-SLC
S1A_IW_SLC__1SSH_20171006T043545_20171006T043612_018687_01F86C_E4C3-SLC	S1B_IW_SLC__1SSH_20171012T043504_20171012T043531_007791_00DC2F_2A52-SLC	S1B_IW_SLC__1SSH_20171012T043504_20171012T043531_007791_00DC2F_2A52-SLC	S1A_IW_SLC__1SSH_20171018T043546_20171018T043613_018862_01FDC7_D236-SLC
S1B_IW_SLC__1SSH_20171012T043504_20171012T043531_007791_00DC2F_2A52-SLC	S1A_IW_SLC__1SSH_20171018T043546_20171018T043613_018862_01FDC7_D236-SLC	S1A_IW_SLC__1SSH_20171018T043546_20171018T043613_018862_01FDC7_D236-SLC	S1B_IW_SLC__1SSH_20171024T043504_20171024T043531_007966_00E130_4A43-SLC
S1A_IW_SLC__1SSH_20171018T043546_20171018T043613_018862_01FDC7_D236-SLC	S1B_IW_SLC__1SSH_20171024T043504_20171024T043531_007966_00E130_4A43-SLC	S1B_IW_SLC__1SSH_20171024T043504_20171024T043531_007966_00E130_4A43-SLC	S1A_IW_SLC__1SSH_20171030T043546_20171030T043613_019037_02031A_8350-SLC
S1B_IW_SLC__1SSH_20171024T043504_20171024T043531_007966_00E130_4A43-SLC	S1A_IW_SLC__1SSH_20171030T043546_20171030T043613_019037_02031A_8350-SLC	S1A_IW_SLC__1SSH_20171030T043546_20171030T043613_019037_02031A_8350-SLC	S1B_IW_SLC__1SSH_20171105T043504_20171105T043531_008141_00E638_F0D6-SLC
S1A_IW_SLC__1SSH_20171030T043546_20171030T043613_019037_02031A_8350-SLC	S1B_IW_SLC__1SSH_20171105T043504_20171105T043531_008141_00E638_F0D6-SLC	S1B_IW_SLC__1SSH_20171105T043504_20171105T043531_008141_00E638_F0D6-SLC	S1A_IW_SLC__1SSH_20171111T043545_20171111T043612_019212_02087A_8CC7-SLC
S1B_IW_SLC__1SSH_20171105T043504_20171105T043531_008141_00E638_F0D6-SLC	S1A_IW_SLC__1SSH_20171111T043545_20171111T043612_019212_02087A_8CC7-SLC	S1A_IW_SLC__1SSH_20171111T043545_20171111T043612_019212_02087A_8CC7-SLC	S1B_IW_SLC__1SSH_20171117T043503_20171117T043530_008316_00EB79_E296-SLC
S1A_IW_SLC__1SSH_20171111T043545_20171111T043612_019212_02087A_8CC7-SLC	S1B_IW_SLC__1SSH_20171117T043503_20171117T043530_008316_00EB79_E296-SLC	S1B_IW_SLC__1SSH_20171117T043503_20171117T043530_008316_00EB79_E296-SLC	S1A_IW_SLC__1SSH_20171123T043545_20171123T043612_019387_020E01_8144-SLC
S1B_IW_SLC__1SSH_20171117T043503_20171117T043530_008316_00EB79_E296-SLC	S1A_IW_SLC__1SSH_20171123T043545_20171123T043612_019387_020E01_8144-SLC	S1A_IW_SLC__1SSH_20171123T043545_20171123T043612_019387_020E01_8144-SLC	S1B_IW_SLC__1SSH_20171129T043503_20171129T043530_008491_00F0E2_0E06-SLC
S1A_IW_SLC__1SSH_20171123T043545_20171123T043612_019387_020E01_8144-SLC	S1B_IW_SLC__1SSH_20171129T043503_20171129T043530_008491_00F0E2_0E06-SLC	S1B_IW_SLC__1SSH_20171129T043503_20171129T043530_008491_00F0E2_0E06-SLC	S1A_IW_SLC__1SSH_20171205T043545_20171205T043612_019562_02137F_CEA4-SLC
S1B_IW_SLC__1SSH_20171129T043503_20171129T043530_008491_00F0E2_0E06-SLC	S1A_IW_SLC__1SSH_20171205T043545_20171205T043612_019562_02137F_CEA4-SLC	S1A_IW_SLC__1SSH_20171205T043545_20171205T043612_019562_02137F_CEA4-SLC	S1B_IW_SLC__1SSH_20171211T043503_20171211T043530_008666_00F670_907D-SLC
S1A_IW_SLC__1SSH_20171205T043545_20171205T043612_019562_02137F_CEA4-SLC	S1B_IW_SLC__1SSH_20171211T043503_20171211T043530_008666_00F670_907D-SLC	S1B_IW_SLC__1SSH_20171211T043503_20171211T043530_008666_00F670_907D-SLC	S1A_IW_SLC__1SSH_20171217T043544_20171217T043611_019737_0218EE_F2DC-SLC
S1B_IW_SLC__1SSH_20171211T043503_20171211T043530_008666_00F670_907D-SLC	S1A_IW_SLC__1SSH_20171217T043544_20171217T043611_019737_0218EE_F2DC-SLC	S1A_IW_SLC__1SSH_20171217T043544_20171217T043611_019737_0218EE_F2DC-SLC	S1B_IW_SLC__1SSH_20171223T043502_20171223T043529_008841_00FC03_3077-SLC
S1A_IW_SLC__1SSH_20171217T043544_20171217T043611_019737_0218EE_F2DC-SLC	S1B_IW_SLC__1SSH_20171223T043502_20171223T043529_008841_00FC03_3077-SLC	S1B_IW_SLC__1SSH_20171223T043502_20171223T043529_008841_00FC03_3077-SLC	S1A_IW_SLC__1SSH_20171229T043544_20171229T043611_019912_021E5A_8915-SLC
S1B_IW_SLC__1SSH_20171223T043502_20171223T043529_008841_00FC03_3077-SLC	S1A_IW_SLC__1SSH_20171229T043544_20171229T043611_019912_021E5A_8915-SLC	S1A_IW_SLC__1SSH_20171229T043544_20171229T043611_019912_021E5A_8915-SLC	S1B_IW_SLC__1SSH_20180104T043502_20180104T043529_009016_0101B2_CF75-SLC
S1A_IW_SLC__1SSH_20171229T043544_20171229T043611_019912_021E5A_8915-SLC	S1B_IW_SLC__1SSH_20180104T043502_20180104T043529_009016_0101B2_CF75-SLC	S1B_IW_SLC__1SSH_20180104T043502_20180104T043529_009016_0101B2_CF75-SLC	S1A_IW_SLC__1SSH_20180110T043543_20180110T043610_020087_0223E3_2F01-SLC
S1B_IW_SLC__1SSH_20180104T043502_20180104T043529_009016_0101B2_CF75-SLC	S1A_IW_SLC__1SSH_20180110T043543_20180110T043610_020087_0223E3_2F01-SLC	S1A_IW_SLC__1SSH_20180110T043543_20180110T043610_020087_0223E3_2F01-SLC	S1B_IW_SLC__1SSH_20180116T043501_20180116T043528_009191_010763_8CDA-SLC
S1A_IW_SLC__1SSH_20180110T043543_20180110T043610_020087_0223E3_2F01-SLC	S1B_IW_SLC__1SSH_20180116T043501_20180116T043528_009191_010763_8CDA-SLC	S1B_IW_SLC__1SSH_20180116T043501_20180116T043528_009191_010763_8CDA-SLC	S1A_IW_SLC__1SSH_20180122T043543_20180122T043610_020262_022970_B25B-SLC
S1B_IW_SLC__1SSH_20180116T043501_20180116T043528_009191_010763_8CDA-SLC	S1A_IW_SLC__1SSH_20180122T043543_20180122T043610_020262_022970_B25B-SLC	S1A_IW_SLC__1SSH_20180122T043543_20180122T043610_020262_022970_B25B-SLC	S1B_IW_SLC__1SSH_20180128T043501_20180128T043528_009366_010D1C_578C-SLC
S1A_IW_SLC__1SSH_20180122T043543_20180122T043610_020262_022970_B25B-SLC	S1B_IW_SLC__1SSH_20180128T043501_20180128T043528_009366_010D1C_578C-SLC	S1B_IW_SLC__1SSH_20180128T043501_20180128T043528_009366_010D1C_578C-SLC	S1A_IW_SLC__1SSH_20180203T043543_20180203T043610_020437_022F05_332C-SLC
S1B_IW_SLC__1SSH_20180128T043501_20180128T043528_009366_010D1C_578C-SLC	S1A_IW_SLC__1SSH_20180203T043543_20180203T043610_020437_022F05_332C-SLC	S1A_IW_SLC__1SSH_20180203T043543_20180203T043610_020437_022F05_332C-SLC	S1B_IW_SLC__1SSH_20180209T043501_20180209T043528_009541_0112DE_F581-SLC
S1A_IW_SLC__1SSH_20180203T043543_20180203T043610_020437_022F05_332C-SLC	S1B_IW_SLC__1SSH_20180209T043501_20180209T043528_009541_0112DE_F581-SLC	S1B_IW_SLC__1SSH_20180209T043501_20180209T043528_009541_0112DE_F581-SLC	S1A_IW_SLC__1SSH_20180215T043542_20180215T043609_020612_02349C_8B10-SLC
S1B_IW_SLC__1SSH_20180209T043501_20180209T043528_009541_0112DE_F581-SLC	S1A_IW_SLC__1SSH_20180215T043542_20180215T043609_020612_02349C_8B10-SLC	S1A_IW_SLC__1SSH_20180215T043542_20180215T043609_020612_02349C_8B10-SLC	S1B_IW_SLC__1SSH_20180221T043500_20180221T043527_009716_011899_2AA2-SLC
S1A_IW_SLC__1SSH_20180215T043542_20180215T043609_020612_02349C_8B10-SLC	S1B_IW_SLC__1SSH_20180221T043500_20180221T043527_009716_011899_2AA2-SLC	S1B_IW_SLC__1SSH_20180221T043500_20180221T043527_009716_011899_2AA2-SLC	S1A_IW_SLC__1SSH_20180227T043542_20180227T043609_020787_023A36_3DD8-SLC
S1B_IW_SLC__1SSH_20180221T043500_20180221T043527_009716_011899_2AA2-SLC	S1A_IW_SLC__1SSH_20180227T043542_20180227T043609_020787_023A36_3DD8-SLC	S1A_IW_SLC__1SSH_20180227T043542_20180227T043609_020787_023A36_3DD8-SLC	S1B_IW_SLC__1SSH_20180305T043500_20180305T043527_009891_011E6F_32BC-SLC
S1A_IW_SLC__1SSH_20180227T043542_20180227T043609_020787_023A36_3DD8-SLC	S1B_IW_SLC__1SSH_20180305T043500_20180305T043527_009891_011E6F_32BC-SLC	S1B_IW_SLC__1SSH_20180305T043500_20180305T043527_009891_011E6F_32BC-SLC	S1A_IW_SLC__1SSH_20180311T043542_20180311T043609_020962_023FB4_AF6F-SLC
S1B_IW_SLC__1SSH_20180305T043500_20180305T043527_009891_011E6F_32BC-SLC	S1A_IW_SLC__1SSH_20180311T043542_20180311T043609_020962_023FB4_AF6F-SLC	S1A_IW_SLC__1SSH_20180311T043542_20180311T043609_020962_023FB4_AF6F-SLC	S1B_IW_SLC__1SSH_20180317T043501_20180317T043527_010066_012433_3BF3-SLC
S1A_IW_SLC__1SSH_20180311T043542_20180311T043609_020962_023FB4_AF6F-SLC	S1B_IW_SLC__1SSH_20180317T043501_20180317T043527_010066_012433_3BF3-SLC	S1B_IW_SLC__1SSH_20180317T043501_20180317T043527_010066_012433_3BF3-SLC	S1A_IW_SLC__1SSH_20180323T043542_20180323T043609_021137_024541_AC74-SLC
S1B_IW_SLC__1SSH_20180317T043501_20180317T043527_010066_012433_3BF3-SLC	S1A_IW_SLC__1SSH_20180323T043542_20180323T043609_021137_024541_AC74-SLC	S1A_IW_SLC__1SSH_20180323T043542_20180323T043609_021137_024541_AC74-SLC	S1B_IW_SLC__1SSH_20180329T043501_20180329T043528_010241_0129DD_82C3-SLC
S1A_IW_SLC__1SSH_20180323T043542_20180323T043609_021137_024541_AC74-SLC	S1B_IW_SLC__1SSH_20180329T043501_20180329T043528_010241_0129DD_82C3-SLC	S1B_IW_SLC__1SSH_20180329T043501_20180329T043528_010241_0129DD_82C3-SLC	S1A_IW_SLC__1SSH_20180404T043543_20180404T043610_021312_024AC9_555B-SLC
S1B_IW_SLC__1SSH_20180329T043501_20180329T043528_010241_0129DD_82C3-SLC	S1A_IW_SLC__1SSH_20180404T043543_20180404T043610_021312_024AC9_555B-SLC	S1A_IW_SLC__1SSH_20180404T043543_20180404T043610_021312_024AC9_555B-SLC	S1B_IW_SLC__1SSH_20180410T043501_20180410T043528_010416_012F93_5D9D-SLC
S1A_IW_SLC__1SSH_20180404T043543_20180404T043610_021312_024AC9_555B-SLC	S1B_IW_SLC__1SSH_20180410T043501_20180410T043528_010416_012F93_5D9D-SLC	S1B_IW_SLC__1SSH_20180410T043501_20180410T043528_010416_012F93_5D9D-SLC	S1A_IW_SLC__1SSH_20180416T043543_20180416T043610_021487_02503E_4DFF-SLC
S1B_IW_SLC__1SSH_20180410T043501_20180410T043528_010416_012F93_5D9D-SLC	S1A_IW_SLC__1SSH_20180416T043543_20180416T043610_021487_02503E_4DFF-SLC	S1A_IW_SLC__1SSH_20180416T043543_20180416T043610_021487_02503E_4DFF-SLC	S1B_IW_SLC__1SSH_20180422T043502_20180422T043528_010591_013528_30B0-SLC
S1A_IW_SLC__1SSH_20180416T043543_20180416T043610_021487_02503E_4DFF-SLC	S1B_IW_SLC__1SSH_20180422T043502_20180422T043528_010591_013528_30B0-SLC	S1B_IW_SLC__1SSH_20180422T043502_20180422T043528_010591_013528_30B0-SLC	S1A_IW_SLC__1SSH_20180428T043544_20180428T043611_021662_0255B6_5F28-SLC
S1B_IW_SLC__1SSH_20180422T043502_20180422T043528_010591_013528_30B0-SLC	S1A_IW_SLC__1SSH_20180428T043544_20180428T043611_021662_0255B6_5F28-SLC	S1A_IW_SLC__1SSH_20180428T043544_20180428T043611_021662_0255B6_5F28-SLC	S1B_IW_SLC__1SSH_20180504T043502_20180504T043529_010766_013ACD_31E2-SLC
S1A_IW_SLC__1SSH_20180428T043544_20180428T043611_021662_0255B6_5F28-SLC	S1B_IW_SLC__1SSH_20180504T043502_20180504T043529_010766_013ACD_31E2-SLC	S1B_IW_SLC__1SSH_20180504T043502_20180504T043529_010766_013ACD_31E2-SLC	S1A_IW_SLC__1SSH_20180510T043544_20180510T043611_021837_025B44_ED34-SLC
S1B_IW_SLC__1SSH_20180504T043502_20180504T043529_010766_013ACD_31E2-SLC	S1A_IW_SLC__1SSH_20180510T043544_20180510T043611_021837_025B44_ED34-SLC	S1A_IW_SLC__1SSH_20180510T043544_20180510T043611_021837_025B44_ED34-SLC	S1B_IW_SLC__1SSH_20180516T043503_20180516T043530_010941_014073_9F11-SLC
S1A_IW_SLC__1SSH_20180510T043544_20180510T043611_021837_025B44_ED34-SLC	S1B_IW_SLC__1SSH_20180516T043503_20180516T043530_010941_014073_9F11-SLC	S1B_IW_SLC__1SSH_20180516T043503_20180516T043530_010941_014073_9F11-SLC	S1A_IW_SLC__1SSH_20180522T043545_20180522T043612_022012_0260D9_C517-SLC
S1B_IW_SLC__1SSH_20180516T043503_20180516T043530_010941_014073_9F11-SLC	S1A_IW_SLC__1SSH_20180522T043545_20180522T043612_022012_0260D9_C517-SLC	S1A_IW_SLC__1SSH_20180522T043545_20180522T043612_022012_0260D9_C517-SLC	S1B_IW_SLC__1SSH_20180528T043503_20180528T043530_011116_014628_0D31-SLC
S1A_IW_SLC__1SSH_20180522T043545_20180522T043612_022012_0260D9_C517-SLC	S1B_IW_SLC__1SSH_20180528T043503_20180528T043530_011116_014628_0D31-SLC	S1B_IW_SLC__1SSH_20180528T043503_20180528T043530_011116_014628_0D31-SLC	S1A_IW_SLC__1SSH_20180603T043546_20180603T043613_022187_026665_091A-SLC
S1B_IW_SLC__1SSH_20180528T043503_20180528T043530_011116_014628_0D31-SLC	S1A_IW_SLC__1SSH_20180603T043546_20180603T043613_022187_026665_091A-SLC	S1A_IW_SLC__1SSH_20180603T043546_20180603T043613_022187_026665_091A-SLC	S1B_IW_SLC__1SSH_20180609T043504_20180609T043531_011291_014BAC_C2CF-SLC
S1A_IW_SLC__1SSH_20180603T043546_20180603T043613_022187_026665_091A-SLC	S1B_IW_SLC__1SSH_20180609T043504_20180609T043531_011291_014BAC_C2CF-SLC	S1B_IW_SLC__1SSH_20180609T043504_20180609T043531_011291_014BAC_C2CF-SLC	S1A_IW_SLC__1SSH_20180615T043547_20180615T043614_022362_026BD3_4FFC-SLC
S1B_IW_SLC__1SSH_20180609T043504_20180609T043531_011291_014BAC_C2CF-SLC	S1A_IW_SLC__1SSH_20180615T043547_20180615T043614_022362_026BD3_4FFC-SLC	S1A_IW_SLC__1SSH_20180615T043547_20180615T043614_022362_026BD3_4FFC-SLC	S1B_IW_SLC__1SSH_20180621T043505_20180621T043532_011466_015110_97DF-SLC
S1A_IW_SLC__1SSH_20180615T043547_20180615T043614_022362_026BD3_4FFC-SLC	S1B_IW_SLC__1SSH_20180621T043505_20180621T043532_011466_015110_97DF-SLC	S1B_IW_SLC__1SSH_20180621T043505_20180621T043532_011466_015110_97DF-SLC	S1A_IW_SLC__1SSH_20180627T043547_20180627T043614_022537_0270F6_A0F0-SLC
S1B_IW_SLC__1SSH_20180621T043505_20180621T043532_011466_015110_97DF-SLC	S1A_IW_SLC__1SSH_20180627T043547_20180627T043614_022537_0270F6_A0F0-SLC	S1A_IW_SLC__1SSH_20180627T043547_20180627T043614_022537_0270F6_A0F0-SLC	S1B_IW_SLC__1SSH_20180703T043506_20180703T043533_011641_015687_95BF-SLC
S1A_IW_SLC__1SSH_20180627T043547_20180627T043614_022537_0270F6_A0F0-SLC	S1B_IW_SLC__1SSH_20180703T043506_20180703T043533_011641_015687_95BF-SLC	S1B_IW_SLC__1SSH_20180703T043506_20180703T043533_011641_015687_95BF-SLC	S1A_IW_SLC__1SSH_20180709T043548_20180709T043615_022712_027613_AAF6-SLC
S1B_IW_SLC__1SSH_20180703T043506_20180703T043533_011641_015687_95BF-SLC	S1A_IW_SLC__1SSH_20180709T043548_20180709T043615_022712_027613_AAF6-SLC	S1A_IW_SLC__1SSH_20180709T043548_20180709T043615_022712_027613_AAF6-SLC	S1B_IW_SLC__1SSH_20180715T043506_20180715T043533_011816_015BEB_D1DF-SLC
S1A_IW_SLC__1SSH_20180709T043548_20180709T043615_022712_027613_AAF6-SLC	S1B_IW_SLC__1SSH_20180715T043506_20180715T043533_011816_015BEB_D1DF-SLC	S1B_IW_SLC__1SSH_20180715T043506_20180715T043533_011816_015BEB_D1DF-SLC	S1A_IW_SLC__1SSH_20180721T043549_20180721T043616_022887_027B73_BEBF-SLC
S1B_IW_SLC__1SSH_20180715T043506_20180715T043533_011816_015BEB_D1DF-SLC	S1A_IW_SLC__1SSH_20180721T043549_20180721T043616_022887_027B73_BEBF-SLC	S1A_IW_SLC__1SSH_20180721T043549_20180721T043616_022887_027B73_BEBF-SLC	S1B_IW_SLC__1SSH_20180727T043507_20180727T043534_011991_016135_73C1-SLC
S1A_IW_SLC__1SSH_20180721T043549_20180721T043616_022887_027B73_BEBF-SLC	S1B_IW_SLC__1SSH_20180727T043507_20180727T043534_011991_016135_73C1-SLC	S1B_IW_SLC__1SSH_20180727T043507_20180727T043534_011991_016135_73C1-SLC	S1A_IW_SLC__1SSH_20180802T043549_20180802T043616_023062_0280F8_CD5E-SLC
S1B_IW_SLC__1SSH_20180727T043507_20180727T043534_011991_016135_73C1-SLC	S1A_IW_SLC__1SSH_20180802T043549_20180802T043616_023062_0280F8_CD5E-SLC	S1A_IW_SLC__1SSH_20180802T043549_20180802T043616_023062_0280F8_CD5E-SLC	S1B_IW_SLC__1SSH_20180808T043508_20180808T043535_012166_016687_F069-SLC
S1A_IW_SLC__1SSH_20180802T043549_20180802T043616_023062_0280F8_CD5E-SLC	S1B_IW_SLC__1SSH_20180808T043508_20180808T043535_012166_016687_F069-SLC	S1B_IW_SLC__1SSH_20180808T043508_20180808T043535_012166_016687_F069-SLC	S1A_IW_SLC__1SSH_20180814T043550_20180814T043617_023237_028696_D6B2-SLC
S1B_IW_SLC__1SSH_20180808T043508_20180808T043535_012166_016687_F069-SLC	S1A_IW_SLC__1SSH_20180814T043550_20180814T043617_023237_028696_D6B2-SLC	S1A_IW_SLC__1SSH_20180814T043550_20180814T043617_023237_028696_D6B2-SLC	S1B_IW_SLC__1SSH_20180820T043509_20180820T043536_012341_016BFD_773A-SLC
S1A_IW_SLC__1SSH_20180814T043550_20180814T043617_023237_028696_D6B2-SLC	S1B_IW_SLC__1SSH_20180820T043509_20180820T043536_012341_016BFD_773A-SLC	S1B_IW_SLC__1SSH_20180820T043509_20180820T043536_012341_016BFD_773A-SLC	S1A_IW_SLC__1SSH_20180826T043551_20180826T043618_023412_028C34_54C8-SLC
S1B_IW_SLC__1SSH_20180820T043509_20180820T043536_012341_016BFD_773A-SLC	S1A_IW_SLC__1SSH_20180826T043551_20180826T043618_023412_028C34_54C8-SLC	S1A_IW_SLC__1SSH_20180826T043551_20180826T043618_023412_028C34_54C8-SLC	S1B_IW_SLC__1SSH_20180901T043509_20180901T043536_012516_017164_8FED-SLC
S1A_IW_SLC__1SSH_20180826T043551_20180826T043618_023412_028C34_54C8-SLC	S1B_IW_SLC__1SSH_20180901T043509_20180901T043536_012516_017164_8FED-SLC	S1B_IW_SLC__1SSH_20180901T043509_20180901T043536_012516_017164_8FED-SLC	S1A_IW_SLC__1SSH_20180907T043551_20180907T043618_023587_0291CB_E755-SLC
S1B_IW_SLC__1SSH_20180901T043509_20180901T043536_012516_017164_8FED-SLC	S1A_IW_SLC__1SSH_20180907T043551_20180907T043618_023587_0291CB_E755-SLC	S1A_IW_SLC__1SSH_20180907T043551_20180907T043618_023587_0291CB_E755-SLC	S1B_IW_SLC__1SSH_20180913T043510_20180913T043537_012691_0176BD_0603-SLC
S1A_IW_SLC__1SSH_20180907T043551_20180907T043618_023587_0291CB_E755-SLC	S1B_IW_SLC__1SSH_20180913T043510_20180913T043537_012691_0176BD_0603-SLC	S1B_IW_SLC__1SSH_20180913T043510_20180913T043537_012691_0176BD_0603-SLC	S1A_IW_SLC__1SSH_20180919T043552_20180919T043619_023762_02976D_C888-SLC
S1B_IW_SLC__1SSH_20180913T043510_20180913T043537_012691_0176BD_0603-SLC	S1A_IW_SLC__1SSH_20180919T043552_20180919T043619_023762_02976D_C888-SLC	S1A_IW_SLC__1SSH_20180919T043552_20180919T043619_023762_02976D_C888-SLC	S1B_IW_SLC__1SSH_20180925T043510_20180925T043537_012866_017C22_6C85-SLC
S1A_IW_SLC__1SSH_20180919T043552_20180919T043619_023762_02976D_C888-SLC	S1B_IW_SLC__1SSH_20180925T043510_20180925T043537_012866_017C22_6C85-SLC	S1B_IW_SLC__1SSH_20180925T043510_20180925T043537_012866_017C22_6C85-SLC	S1A_IW_SLC__1SSH_20181001T043552_20181001T043619_023937_029D1E_BD9C-SLC
S1B_IW_SLC__1SSH_20180925T043510_20180925T043537_012866_017C22_6C85-SLC	S1A_IW_SLC__1SSH_20181001T043552_20181001T043619_023937_029D1E_BD9C-SLC	S1A_IW_SLC__1SSH_20181001T043552_20181001T043619_023937_029D1E_BD9C-SLC	S1B_IW_SLC__1SSH_20181007T043510_20181007T043537_013041_018178_5866-SLC
S1A_IW_SLC__1SSH_20181001T043552_20181001T043619_023937_029D1E_BD9C-SLC	S1B_IW_SLC__1SSH_20181007T043510_20181007T043537_013041_018178_5866-SLC	S1B_IW_SLC__1SSH_20181007T043510_20181007T043537_013041_018178_5866-SLC	S1A_IW_SLC__1SSH_20181013T043552_20181013T043619_024112_02A2D7_E556-SLC
S1B_IW_SLC__1SSH_20181007T043510_20181007T043537_013041_018178_5866-SLC	S1A_IW_SLC__1SSH_20181013T043552_20181013T043619_024112_02A2D7_E556-SLC	S1A_IW_SLC__1SSH_20181013T043552_20181013T043619_024112_02A2D7_E556-SLC	S1B_IW_SLC__1SSH_20181019T043510_20181019T043537_013216_0186DF_9E54-SLC
S1A_IW_SLC__1SSH_20181013T043552_20181013T043619_024112_02A2D7_E556-SLC	S1B_IW_SLC__1SSH_20181019T043510_20181019T043537_013216_0186DF_9E54-SLC	S1B_IW_SLC__1SSH_20181019T043510_20181019T043537_013216_0186DF_9E54-SLC	S1A_IW_SLC__1SSH_20181025T043552_20181025T043619_024287_02A87F_EA77-SLC
S1B_IW_SLC__1SSH_20181019T043510_20181019T043537_013216_0186DF_9E54-SLC	S1A_IW_SLC__1SSH_20181025T043552_20181025T043619_024287_02A87F_EA77-SLC	S1A_IW_SLC__1SSH_20181025T043552_20181025T043619_024287_02A87F_EA77-SLC	S1B_IW_SLC__1SSH_20181031T043510_20181031T043537_013391_018C5A_7609-SLC
S1A_IW_SLC__1SSH_20181025T043552_20181025T043619_024287_02A87F_EA77-SLC	S1B_IW_SLC__1SSH_20181031T043510_20181031T043537_013391_018C5A_7609-SLC	S1B_IW_SLC__1SSH_20181031T043510_20181031T043537_013391_018C5A_7609-SLC	S1A_IW_SLC__1SSH_20181106T043552_20181106T043619_024462_02AE84_9150-SLC
S1B_IW_SLC__1SSH_20181031T043510_20181031T043537_013391_018C5A_7609-SLC	S1A_IW_SLC__1SSH_20181106T043552_20181106T043619_024462_02AE84_9150-SLC	S1A_IW_SLC__1SSH_20181106T043552_20181106T043619_024462_02AE84_9150-SLC	S1B_IW_SLC__1SSH_20181112T043510_20181112T043537_013566_0191CA_FED0-SLC
S1A_IW_SLC__1SSH_20181106T043552_20181106T043619_024462_02AE84_9150-SLC	S1B_IW_SLC__1SSH_20181112T043510_20181112T043537_013566_0191CA_FED0-SLC	S1B_IW_SLC__1SSH_20181112T043510_20181112T043537_013566_0191CA_FED0-SLC	S1A_IW_SLC__1SSH_20181118T043552_20181118T043619_024637_02B4F1_F82D-SLC
S1B_IW_SLC__1SSH_20181112T043510_20181112T043537_013566_0191CA_FED0-SLC	S1A_IW_SLC__1SSH_20181118T043552_20181118T043619_024637_02B4F1_F82D-SLC	S1A_IW_SLC__1SSH_20181118T043552_20181118T043619_024637_02B4F1_F82D-SLC	S1B_IW_SLC__1SSH_20181124T043510_20181124T043537_013741_019756_3182-SLC
S1A_IW_SLC__1SSH_20181118T043552_20181118T043619_024637_02B4F1_F82D-SLC	S1B_IW_SLC__1SSH_20181124T043510_20181124T043537_013741_019756_3182-SLC	S1B_IW_SLC__1SSH_20181124T043510_20181124T043537_013741_019756_3182-SLC	S1B_IW_SLC__1SSH_20181206T043510_20181206T043537_013916_019CFC_062F-SLC
S1B_IW_SLC__1SSH_20181124T043510_20181124T043537_013741_019756_3182-SLC	S1B_IW_SLC__1SSH_20181206T043510_20181206T043537_013916_019CFC_062F-SLC	S1B_IW_SLC__1SSH_20181206T043510_20181206T043537_013916_019CFC_062F-SLC	S1A_IW_SLC__1SSH_20181212T043551_20181212T043618_024987_02C13D_3850-SLC
S1B_IW_SLC__1SSH_20181206T043510_20181206T043537_013916_019CFC_062F-SLC	S1A_IW_SLC__1SSH_20181212T043551_20181212T043618_024987_02C13D_3850-SLC	S1A_IW_SLC__1SSH_20181212T043551_20181212T043618_024987_02C13D_3850-SLC	S1B_IW_SLC__1SSH_20181218T043509_20181218T043536_014091_01A2B7_B944-SLC
S1A_IW_SLC__1SSH_20181212T043551_20181212T043618_024987_02C13D_3850-SLC	S1B_IW_SLC__1SSH_20181218T043509_20181218T043536_014091_01A2B7_B944-SLC	S1B_IW_SLC__1SSH_20181218T043509_20181218T043536_014091_01A2B7_B944-SLC	S1A_IW_SLC__1SSH_20181224T043551_20181224T043618_025162_02C790_400F-SLC
S1B_IW_SLC__1SSH_20181218T043509_20181218T043536_014091_01A2B7_B944-SLC	S1A_IW_SLC__1SSH_20181224T043551_20181224T043618_025162_02C790_400F-SLC	S1A_IW_SLC__1SSH_20181224T043551_20181224T043618_025162_02C790_400F-SLC	S1B_IW_SLC__1SSH_20181230T043509_20181230T043536_014266_01A88D_65A5-SLC
S1A_IW_SLC__1SSH_20181224T043551_20181224T043618_025162_02C790_400F-SLC	S1B_IW_SLC__1SSH_20181230T043509_20181230T043536_014266_01A88D_65A5-SLC	S1B_IW_SLC__1SSH_20181230T043509_20181230T043536_014266_01A88D_65A5-SLC	S1A_IW_SLC__1SSH_20190105T043550_20190105T043617_025337_02CDE0_BDBD-SLC
S1B_IW_SLC__1SSH_20181230T043509_20181230T043536_014266_01A88D_65A5-SLC	S1A_IW_SLC__1SSH_20190105T043550_20190105T043617_025337_02CDE0_BDBD-SLC	S1A_IW_SLC__1SSH_20190105T043550_20190105T043617_025337_02CDE0_BDBD-SLC	S1B_IW_SLC__1SSH_20190111T043508_20190111T043535_014441_01AE32_A88D-SLC
S1A_IW_SLC__1SSH_20190105T043550_20190105T043617_025337_02CDE0_BDBD-SLC	S1B_IW_SLC__1SSH_20190111T043508_20190111T043535_014441_01AE32_A88D-SLC	S1B_IW_SLC__1SSH_20190111T043508_20190111T043535_014441_01AE32_A88D-SLC	S1A_IW_SLC__1SSH_20190117T043550_20190117T043617_025512_02D430_7612-SLC
S1B_IW_SLC__1SSH_20190111T043508_20190111T043535_014441_01AE32_A88D-SLC	S1A_IW_SLC__1SSH_20190117T043550_20190117T043617_025512_02D430_7612-SLC	S1A_IW_SLC__1SSH_20190117T043550_20190117T043617_025512_02D430_7612-SLC	S1B_IW_SLC__1SSH_20190123T043508_20190123T043535_014616_01B3CE_DDED-SLC
S1A_IW_SLC__1SSH_20190117T043550_20190117T043617_025512_02D430_7612-SLC	S1B_IW_SLC__1SSH_20190123T043508_20190123T043535_014616_01B3CE_DDED-SLC	S1B_IW_SLC__1SSH_20190123T043508_20190123T043535_014616_01B3CE_DDED-SLC	S1A_IW_SLC__1SSH_20190129T043549_20190129T043616_025687_02DA98_A3E7-SLC
S1B_IW_SLC__1SSH_20190123T043508_20190123T043535_014616_01B3CE_DDED-SLC	S1A_IW_SLC__1SSH_20190129T043549_20190129T043616_025687_02DA98_A3E7-SLC	S1A_IW_SLC__1SSH_20190129T043549_20190129T043616_025687_02DA98_A3E7-SLC	S1B_IW_SLC__1SSH_20190204T043508_20190204T043534_014791_01B97D_0A20-SLC
S1A_IW_SLC__1SSH_20190129T043549_20190129T043616_025687_02DA98_A3E7-SLC	S1B_IW_SLC__1SSH_20190204T043508_20190204T043534_014791_01B97D_0A20-SLC	S1B_IW_SLC__1SSH_20190204T043508_20190204T043534_014791_01B97D_0A20-SLC	S1A_IW_SLC__1SSH_20190210T043549_20190210T043616_025862_02E0E3_B447-SLC
S1B_IW_SLC__1SSH_20190204T043508_20190204T043534_014791_01B97D_0A20-SLC	S1A_IW_SLC__1SSH_20190210T043549_20190210T043616_025862_02E0E3_B447-SLC	S1A_IW_SLC__1SSH_20190210T043549_20190210T043616_025862_02E0E3_B447-SLC	S1B_IW_SLC__1SSH_20190216T043507_20190216T043534_014966_01BF39_3BBF-SLC
S1A_IW_SLC__1SSH_20190210T043549_20190210T043616_025862_02E0E3_B447-SLC	S1B_IW_SLC__1SSH_20190216T043507_20190216T043534_014966_01BF39_3BBF-SLC	S1B_IW_SLC__1SSH_20190216T043507_20190216T043534_014966_01BF39_3BBF-SLC	S1A_IW_SLC__1SSH_20190222T043549_20190222T043616_026037_02E715_0B2C-SLC
S1B_IW_SLC__1SSH_20190216T043507_20190216T043534_014966_01BF39_3BBF-SLC	S1A_IW_SLC__1SSH_20190222T043549_20190222T043616_026037_02E715_0B2C-SLC	S1A_IW_SLC__1SSH_20190222T043549_20190222T043616_026037_02E715_0B2C-SLC	S1A_IW_SLC__1SSH_20190306T043549_20190306T043616_026212_02ED57_5FC5-SLC
S1A_IW_SLC__1SSH_20190222T043549_20190222T043616_026037_02E715_0B2C-SLC	S1A_IW_SLC__1SSH_20190306T043549_20190306T043616_026212_02ED57_5FC5-SLC	S1A_IW_SLC__1SSH_20190306T043549_20190306T043616_026212_02ED57_5FC5-SLC	S1B_IW_SLC__1SSH_20190312T043507_20190312T043534_015316_01CAB8_1E81-SLC
S1A_IW_SLC__1SSH_20190306T043549_20190306T043616_026212_02ED57_5FC5-SLC	S1B_IW_SLC__1SSH_20190312T043507_20190312T043534_015316_01CAB8_1E81-SLC	S1B_IW_SLC__1SSH_20190312T043507_20190312T043534_015316_01CAB8_1E81-SLC	S1A_IW_SLC__1SSH_20190318T043549_20190318T043616_026387_02F3CE_B723-SLC
S1B_IW_SLC__1SSH_20190312T043507_20190312T043534_015316_01CAB8_1E81-SLC	S1A_IW_SLC__1SSH_20190318T043549_20190318T043616_026387_02F3CE_B723-SLC	S1A_IW_SLC__1SSH_20190318T043549_20190318T043616_026387_02F3CE_B723-SLC	S1B_IW_SLC__1SSH_20190324T043507_20190324T043534_015491_01D060_9B25-SLC
S1A_IW_SLC__1SSH_20190318T043549_20190318T043616_026387_02F3CE_B723-SLC	S1B_IW_SLC__1SSH_20190324T043507_20190324T043534_015491_01D060_9B25-SLC	S1B_IW_SLC__1SSH_20190324T043507_20190324T043534_015491_01D060_9B25-SLC	S1A_IW_SLC__1SSH_20190330T043549_20190330T043616_026562_02FA3D_E434-SLC
S1B_IW_SLC__1SSH_20190324T043507_20190324T043534_015491_01D060_9B25-SLC	S1A_IW_SLC__1SSH_20190330T043549_20190330T043616_026562_02FA3D_E434-SLC	S1A_IW_SLC__1SSH_20190330T043549_20190330T043616_026562_02FA3D_E434-SLC	S1B_IW_SLC__1SSH_20190405T043508_20190405T043535_015666_01D62B_1BA0-SLC
S1A_IW_SLC__1SSH_20190330T043549_20190330T043616_026562_02FA3D_E434-SLC	S1B_IW_SLC__1SSH_20190405T043508_20190405T043535_015666_01D62B_1BA0-SLC	S1B_IW_SLC__1SSH_20190405T043508_20190405T043535_015666_01D62B_1BA0-SLC	S1A_IW_SLC__1SSH_20190411T043549_20190411T043616_026737_0300A6_A523-SLC
S1B_IW_SLC__1SSH_20190405T043508_20190405T043535_015666_01D62B_1BA0-SLC	S1A_IW_SLC__1SSH_20190411T043549_20190411T043616_026737_0300A6_A523-SLC	S1A_IW_SLC__1SSH_20190411T043549_20190411T043616_026737_0300A6_A523-SLC	S1B_IW_SLC__1SSH_20190417T043508_20190417T043535_015841_01DBFB_C0B8-SLC
S1A_IW_SLC__1SSH_20190411T043549_20190411T043616_026737_0300A6_A523-SLC	S1B_IW_SLC__1SSH_20190417T043508_20190417T043535_015841_01DBFB_C0B8-SLC	S1B_IW_SLC__1SSH_20190417T043508_20190417T043535_015841_01DBFB_C0B8-SLC	S1A_IW_SLC__1SSH_20190423T043550_20190423T043617_026912_0306FD_119F-SLC
S1B_IW_SLC__1SSH_20190417T043508_20190417T043535_015841_01DBFB_C0B8-SLC	S1A_IW_SLC__1SSH_20190423T043550_20190423T043617_026912_0306FD_119F-SLC	S1A_IW_SLC__1SSH_20190423T043550_20190423T043617_026912_0306FD_119F-SLC	S1B_IW_SLC__1SSH_20190429T043509_20190429T043536_016016_01E1CB_EC35-SLC
S1A_IW_SLC__1SSH_20190423T043550_20190423T043617_026912_0306FD_119F-SLC	S1B_IW_SLC__1SSH_20190429T043509_20190429T043536_016016_01E1CB_EC35-SLC	S1B_IW_SLC__1SSH_20190429T043509_20190429T043536_016016_01E1CB_EC35-SLC	S1A_IW_SLC__1SSH_20190505T043550_20190505T043617_027087_030D5D_52FF-SLC
S1B_IW_SLC__1SSH_20190429T043509_20190429T043536_016016_01E1CB_EC35-SLC	S1A_IW_SLC__1SSH_20190505T043550_20190505T043617_027087_030D5D_52FF-SLC	S1A_IW_SLC__1SSH_20190505T043550_20190505T043617_027087_030D5D_52FF-SLC	S1B_IW_SLC__1SSH_20190511T043509_20190511T043536_016191_01E781_8BA9-SLC
S1A_IW_SLC__1SSH_20190505T043550_20190505T043617_027087_030D5D_52FF-SLC	S1B_IW_SLC__1SSH_20190511T043509_20190511T043536_016191_01E781_8BA9-SLC	S1B_IW_SLC__1SSH_20190511T043509_20190511T043536_016191_01E781_8BA9-SLC	S1A_IW_SLC__1SSH_20190517T043551_20190517T043618_027262_0312ED_CAD2-SLC
S1B_IW_SLC__1SSH_20190511T043509_20190511T043536_016191_01E781_8BA9-SLC	S1A_IW_SLC__1SSH_20190517T043551_20190517T043618_027262_0312ED_CAD2-SLC	S1A_IW_SLC__1SSH_20190517T043551_20190517T043618_027262_0312ED_CAD2-SLC	S1B_IW_SLC__1SSH_20190523T043510_20190523T043537_016366_01ECEB_B56C-SLC
S1A_IW_SLC__1SSH_20190517T043551_20190517T043618_027262_0312ED_CAD2-SLC	S1B_IW_SLC__1SSH_20190523T043510_20190523T043537_016366_01ECEB_B56C-SLC	S1B_IW_SLC__1SSH_20190523T043510_20190523T043537_016366_01ECEB_B56C-SLC	S1A_IW_SLC__1SSH_20190529T043552_20190529T043618_027437_031864_E2F7-SLC
S1B_IW_SLC__1SSH_20190523T043510_20190523T043537_016366_01ECEB_B56C-SLC	S1A_IW_SLC__1SSH_20190529T043552_20190529T043618_027437_031864_E2F7-SLC	S1A_IW_SLC__1SSH_20190529T043552_20190529T043618_027437_031864_E2F7-SLC	S1B_IW_SLC__1SSH_20190604T043510_20190604T043537_016541_01F23A_5FF3-SLC
S1A_IW_SLC__1SSH_20190529T043552_20190529T043618_027437_031864_E2F7-SLC	S1B_IW_SLC__1SSH_20190604T043510_20190604T043537_016541_01F23A_5FF3-SLC	S1B_IW_SLC__1SSH_20190604T043510_20190604T043537_016541_01F23A_5FF3-SLC	S1A_IW_SLC__1SSH_20190610T043552_20190610T043619_027612_031DC2_6F44-SLC
S1B_IW_SLC__1SSH_20190604T043510_20190604T043537_016541_01F23A_5FF3-SLC	S1A_IW_SLC__1SSH_20190610T043552_20190610T043619_027612_031DC2_6F44-SLC	S1A_IW_SLC__1SSH_20190610T043552_20190610T043619_027612_031DC2_6F44-SLC	S1B_IW_SLC__1SSH_20190616T043511_20190616T043538_016716_01F769_45A5-SLC
S1A_IW_SLC__1SSH_20190610T043552_20190610T043619_027612_031DC2_6F44-SLC	S1B_IW_SLC__1SSH_20190616T043511_20190616T043538_016716_01F769_45A5-SLC	S1B_IW_SLC__1SSH_20190616T043511_20190616T043538_016716_01F769_45A5-SLC	S1A_IW_SLC__1SSH_20190622T043553_20190622T043620_027787_0322FF_7A61-SLC
S1B_IW_SLC__1SSH_20190616T043511_20190616T043538_016716_01F769_45A5-SLC	S1A_IW_SLC__1SSH_20190622T043553_20190622T043620_027787_0322FF_7A61-SLC	S1A_IW_SLC__1SSH_20190622T043553_20190622T043620_027787_0322FF_7A61-SLC	S1B_IW_SLC__1SSH_20190628T043512_20190628T043539_016891_01FC92_FF7B-SLC
S1A_IW_SLC__1SSH_20190622T043553_20190622T043620_027787_0322FF_7A61-SLC	S1B_IW_SLC__1SSH_20190628T043512_20190628T043539_016891_01FC92_FF7B-SLC	S1B_IW_SLC__1SSH_20190628T043512_20190628T043539_016891_01FC92_FF7B-SLC	S1A_IW_SLC__1SSH_20190704T043554_20190704T043621_027962_032846_5AC8-SLC
S1B_IW_SLC__1SSH_20190628T043512_20190628T043539_016891_01FC92_FF7B-SLC	S1A_IW_SLC__1SSH_20190704T043554_20190704T043621_027962_032846_5AC8-SLC	S1A_IW_SLC__1SSH_20190704T043554_20190704T043621_027962_032846_5AC8-SLC	S1B_IW_SLC__1SSH_20190710T043512_20190710T043539_017066_0201C3_EA70-SLC
S1A_IW_SLC__1SSH_20190704T043554_20190704T043621_027962_032846_5AC8-SLC	S1B_IW_SLC__1SSH_20190710T043512_20190710T043539_017066_0201C3_EA70-SLC	S1B_IW_SLC__1SSH_20190710T043512_20190710T043539_017066_0201C3_EA70-SLC	S1A_IW_SLC__1SSH_20190716T043554_20190716T043621_028137_032D94_002C-SLC
S1B_IW_SLC__1SSH_20190710T043512_20190710T043539_017066_0201C3_EA70-SLC	S1A_IW_SLC__1SSH_20190716T043554_20190716T043621_028137_032D94_002C-SLC	S1A_IW_SLC__1SSH_20190716T043554_20190716T043621_028137_032D94_002C-SLC	S1B_IW_SLC__1SSH_20190722T043513_20190722T043540_017241_0206DA_C302-SLC
S1A_IW_SLC__1SSH_20190716T043554_20190716T043621_028137_032D94_002C-SLC	S1B_IW_SLC__1SSH_20190722T043513_20190722T043540_017241_0206DA_C302-SLC	S1B_IW_SLC__1SSH_20190722T043513_20190722T043540_017241_0206DA_C302-SLC	S1A_IW_SLC__1SSH_20190728T043555_20190728T043622_028312_0332EB_B81D-SLC
S1B_IW_SLC__1SSH_20190722T043513_20190722T043540_017241_0206DA_C302-SLC	S1A_IW_SLC__1SSH_20190728T043555_20190728T043622_028312_0332EB_B81D-SLC	S1A_IW_SLC__1SSH_20190728T043555_20190728T043622_028312_0332EB_B81D-SLC	S1B_IW_SLC__1SSH_20190803T043514_20190803T043541_017416_020C19_0826-SLC
S1A_IW_SLC__1SSH_20190728T043555_20190728T043622_028312_0332EB_B81D-SLC	S1B_IW_SLC__1SSH_20190803T043514_20190803T043541_017416_020C19_0826-SLC	S1B_IW_SLC__1SSH_20190803T043514_20190803T043541_017416_020C19_0826-SLC	S1A_IW_SLC__1SSH_20190809T043556_20190809T043623_028487_033850_137A-SLC
S1B_IW_SLC__1SSH_20190803T043514_20190803T043541_017416_020C19_0826-SLC	S1A_IW_SLC__1SSH_20190809T043556_20190809T043623_028487_033850_137A-SLC	S1A_IW_SLC__1SSH_20190809T043556_20190809T043623_028487_033850_137A-SLC	S1B_IW_SLC__1SSH_20190815T043515_20190815T043542_017591_021174_D112-SLC
S1A_IW_SLC__1SSH_20190809T043556_20190809T043623_028487_033850_137A-SLC	S1B_IW_SLC__1SSH_20190815T043515_20190815T043542_017591_021174_D112-SLC	S1B_IW_SLC__1SSH_20190815T043515_20190815T043542_017591_021174_D112-SLC	S1A_IW_SLC__1SSH_20190821T043557_20190821T043624_028662_033E69_32C8-SLC
S1B_IW_SLC__1SSH_20190815T043515_20190815T043542_017591_021174_D112-SLC	S1A_IW_SLC__1SSH_20190821T043557_20190821T043624_028662_033E69_32C8-SLC	S1A_IW_SLC__1SSH_20190821T043557_20190821T043624_028662_033E69_32C8-SLC	S1B_IW_SLC__1SSH_20190827T043515_20190827T043542_017766_0216F0_3A47-SLC
S1A_IW_SLC__1SSH_20190821T043557_20190821T043624_028662_033E69_32C8-SLC	S1B_IW_SLC__1SSH_20190827T043515_20190827T043542_017766_0216F0_3A47-SLC	S1B_IW_SLC__1SSH_20190827T043515_20190827T043542_017766_0216F0_3A47-SLC	S1A_IW_SLC__1SSH_20190902T043557_20190902T043624_028837_034481_41F9-SLC
S1B_IW_SLC__1SSH_20190827T043515_20190827T043542_017766_0216F0_3A47-SLC	S1A_IW_SLC__1SSH_20190902T043557_20190902T043624_028837_034481_41F9-SLC	S1A_IW_SLC__1SSH_20190902T043557_20190902T043624_028837_034481_41F9-SLC	S1B_IW_SLC__1SSH_20190908T043516_20190908T043543_017941_021C5B_30F5-SLC
S1A_IW_SLC__1SSH_20190902T043557_20190902T043624_028837_034481_41F9-SLC	S1B_IW_SLC__1SSH_20190908T043516_20190908T043543_017941_021C5B_30F5-SLC	S1B_IW_SLC__1SSH_20190908T043516_20190908T043543_017941_021C5B_30F5-SLC	S1B_IW_SLC__1SSH_20190920T043516_20190920T043543_018116_0221CD_B1CA-SLC
S1B_IW_SLC__1SSH_20190908T043516_20190908T043543_017941_021C5B_30F5-SLC	S1B_IW_SLC__1SSH_20190920T043516_20190920T043543_018116_0221CD_B1CA-SLC	S1B_IW_SLC__1SSH_20190920T043516_20190920T043543_018116_0221CD_B1CA-SLC	S1A_IW_SLC__1SSH_20190926T043558_20190926T043625_029187_035086_A869-SLC
S1B_IW_SLC__1SSH_20190920T043516_20190920T043543_018116_0221CD_B1CA-SLC	S1A_IW_SLC__1SSH_20190926T043558_20190926T043625_029187_035086_A869-SLC	S1A_IW_SLC__1SSH_20190926T043558_20190926T043625_029187_035086_A869-SLC	S1B_IW_SLC__1SSH_20191002T043517_20191002T043544_018291_02273B_356F-SLC
S1A_IW_SLC__1SSH_20190926T043558_20190926T043625_029187_035086_A869-SLC	S1B_IW_SLC__1SSH_20191002T043517_20191002T043544_018291_02273B_356F-SLC	S1B_IW_SLC__1SSH_20191002T043517_20191002T043544_018291_02273B_356F-SLC	S1A_IW_SLC__1SSH_20191008T043558_20191008T043625_029362_035690_42E7-SLC
S1B_IW_SLC__1SSH_20191002T043517_20191002T043544_018291_02273B_356F-SLC	S1A_IW_SLC__1SSH_20191008T043558_20191008T043625_029362_035690_42E7-SLC	S1A_IW_SLC__1SSH_20191008T043558_20191008T043625_029362_035690_42E7-SLC	S1B_IW_SLC__1SSH_20191014T043517_20191014T043544_018466_022CAD_58F8-SLC
S1A_IW_SLC__1SSH_20191008T043558_20191008T043625_029362_035690_42E7-SLC	S1B_IW_SLC__1SSH_20191014T043517_20191014T043544_018466_022CAD_58F8-SLC	S1B_IW_SLC__1SSH_20191014T043517_20191014T043544_018466_022CAD_58F8-SLC	S1A_IW_SLC__1SSH_20191020T043558_20191020T043625_029537_035C9E_858F-SLC
S1B_IW_SLC__1SSH_20191014T043517_20191014T043544_018466_022CAD_58F8-SLC	S1A_IW_SLC__1SSH_20191020T043558_20191020T043625_029537_035C9E_858F-SLC	S1A_IW_SLC__1SSH_20191020T043558_20191020T043625_029537_035C9E_858F-SLC	S1B_IW_SLC__1SSH_20191026T043517_20191026T043544_018641_023209_5290-SLC
S1A_IW_SLC__1SSH_20191020T043558_20191020T043625_029537_035C9E_858F-SLC	S1B_IW_SLC__1SSH_20191026T043517_20191026T043544_018641_023209_5290-SLC	S1B_IW_SLC__1SSH_20191026T043517_20191026T043544_018641_023209_5290-SLC	S1A_IW_SLC__1SSH_20191101T043559_20191101T043625_029712_0362B4_46C4-SLC
S1B_IW_SLC__1SSH_20191026T043517_20191026T043544_018641_023209_5290-SLC	S1A_IW_SLC__1SSH_20191101T043559_20191101T043625_029712_0362B4_46C4-SLC	S1A_IW_SLC__1SSH_20191101T043559_20191101T043625_029712_0362B4_46C4-SLC	S1B_IW_SLC__1SSH_20191107T043517_20191107T043544_018816_0237A4_962E-SLC
S1A_IW_SLC__1SSH_20191101T043559_20191101T043625_029712_0362B4_46C4-SLC	S1B_IW_SLC__1SSH_20191107T043517_20191107T043544_018816_0237A4_962E-SLC	S1B_IW_SLC__1SSH_20191107T043517_20191107T043544_018816_0237A4_962E-SLC	S1A_IW_SLC__1SSH_20191113T043559_20191113T043625_029887_0368D8_84FA-SLC
S1B_IW_SLC__1SSH_20191107T043517_20191107T043544_018816_0237A4_962E-SLC	S1A_IW_SLC__1SSH_20191113T043559_20191113T043625_029887_0368D8_84FA-SLC	S1A_IW_SLC__1SSH_20191113T043559_20191113T043625_029887_0368D8_84FA-SLC	S1B_IW_SLC__1SSH_20191119T043517_20191119T043544_018991_023D52_270B-SLC
S1A_IW_SLC__1SSH_20191113T043559_20191113T043625_029887_0368D8_84FA-SLC	S1B_IW_SLC__1SSH_20191119T043517_20191119T043544_018991_023D52_270B-SLC	S1B_IW_SLC__1SSH_20191119T043517_20191119T043544_018991_023D52_270B-SLC	S1A_IW_SLC__1SSH_20191125T043558_20191125T043625_030062_036EE9_297A-SLC
S1B_IW_SLC__1SSH_20191119T043517_20191119T043544_018991_023D52_270B-SLC	S1A_IW_SLC__1SSH_20191125T043558_20191125T043625_030062_036EE9_297A-SLC	S1A_IW_SLC__1SSH_20191125T043558_20191125T043625_030062_036EE9_297A-SLC	S1B_IW_SLC__1SSH_20191201T043516_20191201T043543_019166_0242E0_1739-SLC
S1A_IW_SLC__1SSH_20191125T043558_20191125T043625_030062_036EE9_297A-SLC	S1B_IW_SLC__1SSH_20191201T043516_20191201T043543_019166_0242E0_1739-SLC	S1B_IW_SLC__1SSH_20191201T043516_20191201T043543_019166_0242E0_1739-SLC	S1A_IW_SLC__1SSH_20191207T043558_20191207T043625_030237_0374EC_7A65-SLC
S1B_IW_SLC__1SSH_20191201T043516_20191201T043543_019166_0242E0_1739-SLC	S1A_IW_SLC__1SSH_20191207T043558_20191207T043625_030237_0374EC_7A65-SLC	S1A_IW_SLC__1SSH_20191207T043558_20191207T043625_030237_0374EC_7A65-SLC	S1B_IW_SLC__1SSH_20191213T043516_20191213T043543_019341_024874_699E-SLC
S1A_IW_SLC__1SSH_20191207T043558_20191207T043625_030237_0374EC_7A65-SLC	S1B_IW_SLC__1SSH_20191213T043516_20191213T043543_019341_024874_699E-SLC	S1B_IW_SLC__1SSH_20191213T043516_20191213T043543_019341_024874_699E-SLC	S1A_IW_SLC__1SSH_20191219T043557_20191219T043624_030412_037AF9_DD9F-SLC
S1B_IW_SLC__1SSH_20191213T043516_20191213T043543_019341_024874_699E-SLC	S1A_IW_SLC__1SSH_20191219T043557_20191219T043624_030412_037AF9_DD9F-SLC	S1A_IW_SLC__1SSH_20191219T043557_20191219T043624_030412_037AF9_DD9F-SLC	S1B_IW_SLC__1SSH_20191225T043515_20191225T043542_019516_024E06_2DF1-SLC
S1A_IW_SLC__1SSH_20191219T043557_20191219T043624_030412_037AF9_DD9F-SLC	S1B_IW_SLC__1SSH_20191225T043515_20191225T043542_019516_024E06_2DF1-SLC	S1B_IW_SLC__1SSH_20191225T043515_20191225T043542_019516_024E06_2DF1-SLC	S1A_IW_SLC__1SSH_20191231T043557_20191231T043624_030587_038106_711A-SLC
S1B_IW_SLC__1SSH_20191225T043515_20191225T043542_019516_024E06_2DF1-SLC	S1A_IW_SLC__1SSH_20191231T043557_20191231T043624_030587_038106_711A-SLC	S1A_IW_SLC__1SSH_20191231T043557_20191231T043624_030587_038106_711A-SLC	S1B_IW_SLC__1SSH_20200106T043515_20200106T043542_019691_025392_E050-SLC
S1A_IW_SLC__1SSH_20191231T043557_20191231T043624_030587_038106_711A-SLC	S1B_IW_SLC__1SSH_20200106T043515_20200106T043542_019691_025392_E050-SLC	S1B_IW_SLC__1SSH_20200106T043515_20200106T043542_019691_025392_E050-SLC	S1A_IW_SLC__1SSH_20200112T043556_20200112T043623_030762_038717_3E04-SLC
S1B_IW_SLC__1SSH_20200106T043515_20200106T043542_019691_025392_E050-SLC	S1A_IW_SLC__1SSH_20200112T043556_20200112T043623_030762_038717_3E04-SLC	S1A_IW_SLC__1SSH_20200112T043556_20200112T043623_030762_038717_3E04-SLC	S1B_IW_SLC__1SSH_20200118T043514_20200118T043541_019866_025927_DD28-SLC
S1A_IW_SLC__1SSH_20200112T043556_20200112T043623_030762_038717_3E04-SLC	S1B_IW_SLC__1SSH_20200118T043514_20200118T043541_019866_025927_DD28-SLC	S1B_IW_SLC__1SSH_20200118T043514_20200118T043541_019866_025927_DD28-SLC	S1A_IW_SLC__1SSH_20200124T043556_20200124T043623_030937_038D3B_0851-SLC
S1B_IW_SLC__1SSH_20200118T043514_20200118T043541_019866_025927_DD28-SLC	S1A_IW_SLC__1SSH_20200124T043556_20200124T043623_030937_038D3B_0851-SLC	S1A_IW_SLC__1SSH_20200124T043556_20200124T043623_030937_038D3B_0851-SLC	S1B_IW_SLC__1SSH_20200130T043514_20200130T043541_020041_025EBC_928F-SLC
S1A_IW_SLC__1SSH_20200124T043556_20200124T043623_030937_038D3B_0851-SLC	S1B_IW_SLC__1SSH_20200130T043514_20200130T043541_020041_025EBC_928F-SLC	S1B_IW_SLC__1SSH_20200130T043514_20200130T043541_020041_025EBC_928F-SLC	S1A_IW_SLC__1SSH_20200205T043555_20200205T043622_031112_03935B_F469-SLC
S1B_IW_SLC__1SSH_20200130T043514_20200130T043541_020041_025EBC_928F-SLC	S1A_IW_SLC__1SSH_20200205T043555_20200205T043622_031112_03935B_F469-SLC	S1A_IW_SLC__1SSH_20200205T043555_20200205T043622_031112_03935B_F469-SLC	S1B_IW_SLC__1SSH_20200211T043513_20200211T043540_020216_026472_B0B5-SLC
S1A_IW_SLC__1SSH_20200205T043555_20200205T043622_031112_03935B_F469-SLC	S1B_IW_SLC__1SSH_20200211T043513_20200211T043540_020216_026472_B0B5-SLC	S1B_IW_SLC__1SSH_20200211T043513_20200211T043540_020216_026472_B0B5-SLC	S1A_IW_SLC__1SSH_20200217T043555_20200217T043622_031287_039969_133C-SLC
S1B_IW_SLC__1SSH_20200211T043513_20200211T043540_020216_026472_B0B5-SLC	S1A_IW_SLC__1SSH_20200217T043555_20200217T043622_031287_039969_133C-SLC	S1A_IW_SLC__1SSH_20200217T043555_20200217T043622_031287_039969_133C-SLC	S1B_IW_SLC__1SSH_20200223T043513_20200223T043540_020391_026A10_6A9B-SLC
S1A_IW_SLC__1SSH_20200217T043555_20200217T043622_031287_039969_133C-SLC	S1B_IW_SLC__1SSH_20200223T043513_20200223T043540_020391_026A10_6A9B-SLC	S1B_IW_SLC__1SSH_20200223T043513_20200223T043540_020391_026A10_6A9B-SLC	S1A_IW_SLC__1SSH_20200229T043555_20200229T043622_031462_039F69_00C6-SLC
S1B_IW_SLC__1SSH_20200223T043513_20200223T043540_020391_026A10_6A9B-SLC	S1A_IW_SLC__1SSH_20200229T043555_20200229T043622_031462_039F69_00C6-SLC	S1A_IW_SLC__1SSH_20200229T043555_20200229T043622_031462_039F69_00C6-SLC	S1B_IW_SLC__1SSH_20200306T043513_20200306T043540_020566_026F9D_13FB-SLC
S1A_IW_SLC__1SSH_20200229T043555_20200229T043622_031462_039F69_00C6-SLC	S1B_IW_SLC__1SSH_20200306T043513_20200306T043540_020566_026F9D_13FB-SLC	S1B_IW_SLC__1SSH_20200306T043513_20200306T043540_020566_026F9D_13FB-SLC	S1A_IW_SLC__1SSH_20200312T043555_20200312T043622_031637_03A580_ACE5-SLC
S1B_IW_SLC__1SSH_20200306T043513_20200306T043540_020566_026F9D_13FB-SLC	S1A_IW_SLC__1SSH_20200312T043555_20200312T043622_031637_03A580_ACE5-SLC	S1A_IW_SLC__1SSH_20200312T043555_20200312T043622_031637_03A580_ACE5-SLC	S1B_IW_SLC__1SSH_20200318T043513_20200318T043540_020741_027532_66CC-SLC
S1A_IW_SLC__1SSH_20200312T043555_20200312T043622_031637_03A580_ACE5-SLC	S1B_IW_SLC__1SSH_20200318T043513_20200318T043540_020741_027532_66CC-SLC	S1B_IW_SLC__1SSH_20200318T043513_20200318T043540_020741_027532_66CC-SLC	S1A_IW_SLC__1SSH_20200324T043555_20200324T043622_031812_03ABB0_F1E1-SLC
S1B_IW_SLC__1SSH_20200318T043513_20200318T043540_020741_027532_66CC-SLC	S1A_IW_SLC__1SSH_20200324T043555_20200324T043622_031812_03ABB0_F1E1-SLC	S1A_IW_SLC__1SSH_20200324T043555_20200324T043622_031812_03ABB0_F1E1-SLC	S1B_IW_SLC__1SSH_20200330T043514_20200330T043541_020916_027AB3_FBFE-SLC
S1A_IW_SLC__1SSH_20200324T043555_20200324T043622_031812_03ABB0_F1E1-SLC	S1B_IW_SLC__1SSH_20200330T043514_20200330T043541_020916_027AB3_FBFE-SLC	S1B_IW_SLC__1SSH_20200330T043514_20200330T043541_020916_027AB3_FBFE-SLC	S1A_IW_SLC__1SSH_20200405T043556_20200405T043623_031987_03B1CF_19B6-SLC
S1B_IW_SLC__1SSH_20200330T043514_20200330T043541_020916_027AB3_FBFE-SLC	S1A_IW_SLC__1SSH_20200405T043556_20200405T043623_031987_03B1CF_19B6-SLC	S1A_IW_SLC__1SSH_20200405T043556_20200405T043623_031987_03B1CF_19B6-SLC	S1B_IW_SLC__1SSH_20200411T043514_20200411T043541_021091_028043_70A0-SLC
S1A_IW_SLC__1SSH_20200405T043556_20200405T043623_031987_03B1CF_19B6-SLC	S1B_IW_SLC__1SSH_20200411T043514_20200411T043541_021091_028043_70A0-SLC	S1B_IW_SLC__1SSH_20200411T043514_20200411T043541_021091_028043_70A0-SLC	S1A_IW_SLC__1SSH_20200417T043556_20200417T043623_032162_03B7FE_20FB-SLC
S1B_IW_SLC__1SSH_20200411T043514_20200411T043541_021091_028043_70A0-SLC	S1A_IW_SLC__1SSH_20200417T043556_20200417T043623_032162_03B7FE_20FB-SLC	S1A_IW_SLC__1SSH_20200417T043556_20200417T043623_032162_03B7FE_20FB-SLC	S1B_IW_SLC__1SSH_20200423T043514_20200423T043541_021266_0285C8_20A3-SLC
S1A_IW_SLC__1SSH_20200417T043556_20200417T043623_032162_03B7FE_20FB-SLC	S1B_IW_SLC__1SSH_20200423T043514_20200423T043541_021266_0285C8_20A3-SLC	S1B_IW_SLC__1SSH_20200423T043514_20200423T043541_021266_0285C8_20A3-SLC	S1A_IW_SLC__1SSH_20200429T043557_20200429T043624_032337_03BE21_9BE3-SLC
S1B_IW_SLC__1SSH_20200423T043514_20200423T043541_021266_0285C8_20A3-SLC	S1A_IW_SLC__1SSH_20200429T043557_20200429T043624_032337_03BE21_9BE3-SLC	S1A_IW_SLC__1SSH_20200429T043557_20200429T043624_032337_03BE21_9BE3-SLC	S1B_IW_SLC__1SSH_20200505T043515_20200505T043542_021441_028B55_7C5D-SLC
S1A_IW_SLC__1SSH_20200429T043557_20200429T043624_032337_03BE21_9BE3-SLC	S1B_IW_SLC__1SSH_20200505T043515_20200505T043542_021441_028B55_7C5D-SLC	S1B_IW_SLC__1SSH_20200505T043515_20200505T043542_021441_028B55_7C5D-SLC	S1A_IW_SLC__1SSH_20200511T043557_20200511T043624_032512_03C3F0_A7FA-SLC
S1B_IW_SLC__1SSH_20200505T043515_20200505T043542_021441_028B55_7C5D-SLC	S1A_IW_SLC__1SSH_20200511T043557_20200511T043624_032512_03C3F0_A7FA-SLC	S1A_IW_SLC__1SSH_20200511T043557_20200511T043624_032512_03C3F0_A7FA-SLC	S1B_IW_SLC__1SSH_20200517T043516_20200517T043543_021616_02909B_F9DA-SLC
S1A_IW_SLC__1SSH_20200511T043557_20200511T043624_032512_03C3F0_A7FA-SLC	S1B_IW_SLC__1SSH_20200517T043516_20200517T043543_021616_02909B_F9DA-SLC	S1B_IW_SLC__1SSH_20200517T043516_20200517T043543_021616_02909B_F9DA-SLC	S1A_IW_SLC__1SSH_20200523T043558_20200523T043625_032687_03C93E_58C3-SLC
S1B_IW_SLC__1SSH_20200517T043516_20200517T043543_021616_02909B_F9DA-SLC	S1A_IW_SLC__1SSH_20200523T043558_20200523T043625_032687_03C93E_58C3-SLC	S1A_IW_SLC__1SSH_20200523T043558_20200523T043625_032687_03C93E_58C3-SLC	S1B_IW_SLC__1SSH_20200529T043516_20200529T043543_021791_0295CD_3C5F-SLC
S1A_IW_SLC__1SSH_20200523T043558_20200523T043625_032687_03C93E_58C3-SLC	S1B_IW_SLC__1SSH_20200529T043516_20200529T043543_021791_0295CD_3C5F-SLC	S1B_IW_SLC__1SSH_20200529T043516_20200529T043543_021791_0295CD_3C5F-SLC	S1A_IW_SLC__1SSH_20200604T043558_20200604T043625_032862_03CE6F_C9AC-SLC
S1B_IW_SLC__1SSH_20200529T043516_20200529T043543_021791_0295CD_3C5F-SLC	S1A_IW_SLC__1SSH_20200604T043558_20200604T043625_032862_03CE6F_C9AC-SLC	S1A_IW_SLC__1SSH_20200604T043558_20200604T043625_032862_03CE6F_C9AC-SLC	S1B_IW_SLC__1SSH_20200610T043517_20200610T043544_021966_029B0B_769B-SLC
S1A_IW_SLC__1SSH_20200604T043558_20200604T043625_032862_03CE6F_C9AC-SLC	S1B_IW_SLC__1SSH_20200610T043517_20200610T043544_021966_029B0B_769B-SLC	S1B_IW_SLC__1SSH_20200610T043517_20200610T043544_021966_029B0B_769B-SLC	S1A_IW_SLC__1SSH_20200616T043559_20200616T043626_033037_03D3B0_499A-SLC
S1B_IW_SLC__1SSH_20200610T043517_20200610T043544_021966_029B0B_769B-SLC	S1A_IW_SLC__1SSH_20200616T043559_20200616T043626_033037_03D3B0_499A-SLC	S1A_IW_SLC__1SSH_20200616T043559_20200616T043626_033037_03D3B0_499A-SLC	S1B_IW_SLC__1SSH_20200622T043518_20200622T043545_022141_02A060_C676-SLC
S1A_IW_SLC__1SSH_20200616T043559_20200616T043626_033037_03D3B0_499A-SLC	S1B_IW_SLC__1SSH_20200622T043518_20200622T043545_022141_02A060_C676-SLC	S1B_IW_SLC__1SSH_20200622T043518_20200622T043545_022141_02A060_C676-SLC	S1A_IW_SLC__1SSH_20200628T043600_20200628T043627_033212_03D901_D77D-SLC
S1B_IW_SLC__1SSH_20200622T043518_20200622T043545_022141_02A060_C676-SLC	S1A_IW_SLC__1SSH_20200628T043600_20200628T043627_033212_03D901_D77D-SLC	S1A_IW_SLC__1SSH_20200628T043600_20200628T043627_033212_03D901_D77D-SLC	S1B_IW_SLC__1SSH_20200704T043518_20200704T043545_022316_02A5B7_4ED4-SLC
S1A_IW_SLC__1SSH_20200628T043600_20200628T043627_033212_03D901_D77D-SLC	S1B_IW_SLC__1SSH_20200704T043518_20200704T043545_022316_02A5B7_4ED4-SLC	S1B_IW_SLC__1SSH_20200704T043518_20200704T043545_022316_02A5B7_4ED4-SLC	S1A_IW_SLC__1SSH_20200710T043601_20200710T043628_033387_03DE4F_DCBE-SLC
S1B_IW_SLC__1SSH_20200704T043518_20200704T043545_022316_02A5B7_4ED4-SLC	S1A_IW_SLC__1SSH_20200710T043601_20200710T043628_033387_03DE4F_DCBE-SLC	S1A_IW_SLC__1SSH_20200710T043601_20200710T043628_033387_03DE4F_DCBE-SLC	S1B_IW_SLC__1SSH_20200716T043519_20200716T043546_022491_02AB03_95A9-SLC
S1A_IW_SLC__1SSH_20200710T043601_20200710T043628_033387_03DE4F_DCBE-SLC	S1B_IW_SLC__1SSH_20200716T043519_20200716T043546_022491_02AB03_95A9-SLC	S1B_IW_SLC__1SSH_20200716T043519_20200716T043546_022491_02AB03_95A9-SLC	S1A_IW_SLC__1SSH_20200722T043602_20200722T043628_033562_03E3AC_E7AA-SLC
S1B_IW_SLC__1SSH_20200716T043519_20200716T043546_022491_02AB03_95A9-SLC	S1A_IW_SLC__1SSH_20200722T043602_20200722T043628_033562_03E3AC_E7AA-SLC	S1A_IW_SLC__1SSH_20200722T043602_20200722T043628_033562_03E3AC_E7AA-SLC	S1B_IW_SLC__1SSH_20200728T043520_20200728T043547_022666_02B059_CFD0-SLC
S1A_IW_SLC__1SSH_20200722T043602_20200722T043628_033562_03E3AC_E7AA-SLC	S1B_IW_SLC__1SSH_20200728T043520_20200728T043547_022666_02B059_CFD0-SLC	S1B_IW_SLC__1SSH_20200728T043520_20200728T043547_022666_02B059_CFD0-SLC	S1A_IW_SLC__1SSH_20200803T043602_20200803T043629_033737_03E905_4900-SLC
S1B_IW_SLC__1SSH_20200728T043520_20200728T043547_022666_02B059_CFD0-SLC	S1A_IW_SLC__1SSH_20200803T043602_20200803T043629_033737_03E905_4900-SLC	S1A_IW_SLC__1SSH_20200803T043602_20200803T043629_033737_03E905_4900-SLC	S1B_IW_SLC__1SSH_20200809T043521_20200809T043548_022841_02B5B6_CCAD-SLC
S1A_IW_SLC__1SSH_20200803T043602_20200803T043629_033737_03E905_4900-SLC	S1B_IW_SLC__1SSH_20200809T043521_20200809T043548_022841_02B5B6_CCAD-SLC	S1B_IW_SLC__1SSH_20200809T043521_20200809T043548_022841_02B5B6_CCAD-SLC	S1A_IW_SLC__1SSH_20200815T043603_20200815T043630_033912_03EF07_6D0B-SLC
S1B_IW_SLC__1SSH_20200809T043521_20200809T043548_022841_02B5B6_CCAD-SLC	S1A_IW_SLC__1SSH_20200815T043603_20200815T043630_033912_03EF07_6D0B-SLC	S1A_IW_SLC__1SSH_20200815T043603_20200815T043630_033912_03EF07_6D0B-SLC	S1B_IW_SLC__1SSH_20200821T043521_20200821T043548_023016_02BB2A_051A-SLC
S1A_IW_SLC__1SSH_20200815T043603_20200815T043630_033912_03EF07_6D0B-SLC	S1B_IW_SLC__1SSH_20200821T043521_20200821T043548_023016_02BB2A_051A-SLC	S1B_IW_SLC__1SSH_20200821T043521_20200821T043548_023016_02BB2A_051A-SLC	S1A_IW_SLC__1SSH_20200827T043604_20200827T043631_034087_03F530_F6F4-SLC
S1B_IW_SLC__1SSH_20200821T043521_20200821T043548_023016_02BB2A_051A-SLC	S1A_IW_SLC__1SSH_20200827T043604_20200827T043631_034087_03F530_F6F4-SLC	S1A_IW_SLC__1SSH_20200827T043604_20200827T043631_034087_03F530_F6F4-SLC	S1B_IW_SLC__1SSH_20200902T043522_20200902T043549_023191_02C09C_3528-SLC
S1A_IW_SLC__1SSH_20200827T043604_20200827T043631_034087_03F530_F6F4-SLC	S1B_IW_SLC__1SSH_20200902T043522_20200902T043549_023191_02C09C_3528-SLC	S1B_IW_SLC__1SSH_20200902T043522_20200902T043549_023191_02C09C_3528-SLC	S1A_IW_SLC__1SSH_20200908T043604_20200908T043631_034262_03FB5A_C73D-SLC
S1B_IW_SLC__1SSH_20200902T043522_20200902T043549_023191_02C09C_3528-SLC	S1A_IW_SLC__1SSH_20200908T043604_20200908T043631_034262_03FB5A_C73D-SLC	S1A_IW_SLC__1SSH_20200908T043604_20200908T043631_034262_03FB5A_C73D-SLC	S1B_IW_SLC__1SSH_20200914T043522_20200914T043549_023366_02C619_0990-SLC
S1A_IW_SLC__1SSH_20200908T043604_20200908T043631_034262_03FB5A_C73D-SLC	S1B_IW_SLC__1SSH_20200914T043522_20200914T043549_023366_02C619_0990-SLC	S1B_IW_SLC__1SSH_20200914T043522_20200914T043549_023366_02C619_0990-SLC	S1A_IW_SLC__1SSH_20200920T043604_20200920T043631_034437_040196_828B-SLC
S1B_IW_SLC__1SSH_20200914T043522_20200914T043549_023366_02C619_0990-SLC	S1A_IW_SLC__1SSH_20200920T043604_20200920T043631_034437_040196_828B-SLC	S1A_IW_SLC__1SSH_20200920T043604_20200920T043631_034437_040196_828B-SLC	S1B_IW_SLC__1SSH_20200926T043523_20200926T043550_023541_02CB95_FD4C-SLC
S1A_IW_SLC__1SSH_20200920T043604_20200920T043631_034437_040196_828B-SLC	S1B_IW_SLC__1SSH_20200926T043523_20200926T043550_023541_02CB95_FD4C-SLC	S1B_IW_SLC__1SSH_20200926T043523_20200926T043550_023541_02CB95_FD4C-SLC	S1A_IW_SLC__1SSH_20201002T043605_20201002T043632_034612_0407B7_3C29-SLC
S1B_IW_SLC__1SSH_20200926T043523_20200926T043550_023541_02CB95_FD4C-SLC	S1A_IW_SLC__1SSH_20201002T043605_20201002T043632_034612_0407B7_3C29-SLC	S1A_IW_SLC__1SSH_20201002T043605_20201002T043632_034612_0407B7_3C29-SLC	S1B_IW_SLC__1SSH_20201008T043523_20201008T043550_023716_02D10E_FBF1-SLC
S1A_IW_SLC__1SSH_20201002T043605_20201002T043632_034612_0407B7_3C29-SLC	S1B_IW_SLC__1SSH_20201008T043523_20201008T043550_023716_02D10E_FBF1-SLC	S1B_IW_SLC__1SSH_20201008T043523_20201008T043550_023716_02D10E_FBF1-SLC	S1A_IW_SLC__1SSH_20201014T043605_20201014T043632_034787_040DD4_5503-SLC
S1B_IW_SLC__1SSH_20201008T043523_20201008T043550_023716_02D10E_FBF1-SLC	S1A_IW_SLC__1SSH_20201014T043605_20201014T043632_034787_040DD4_5503-SLC	S1A_IW_SLC__1SSH_20201014T043605_20201014T043632_034787_040DD4_5503-SLC	S1B_IW_SLC__1SSH_20201020T043523_20201020T043550_023891_02D67C_FEC9-SLC
S1A_IW_SLC__1SSH_20201014T043605_20201014T043632_034787_040DD4_5503-SLC	S1B_IW_SLC__1SSH_20201020T043523_20201020T043550_023891_02D67C_FEC9-SLC	S1B_IW_SLC__1SSH_20201020T043523_20201020T043550_023891_02D67C_FEC9-SLC	S1A_IW_SLC__1SSH_20201026T043605_20201026T043632_034962_0413D8_3679-SLC
S1B_IW_SLC__1SSH_20201020T043523_20201020T043550_023891_02D67C_FEC9-SLC	S1A_IW_SLC__1SSH_20201026T043605_20201026T043632_034962_0413D8_3679-SLC	S1A_IW_SLC__1SSH_20201026T043605_20201026T043632_034962_0413D8_3679-SLC	S1B_IW_SLC__1SSH_20201101T043523_20201101T043550_024066_02DBF6_2014-SLC
S1A_IW_SLC__1SSH_20201026T043605_20201026T043632_034962_0413D8_3679-SLC	S1B_IW_SLC__1SSH_20201101T043523_20201101T043550_024066_02DBF6_2014-SLC	S1B_IW_SLC__1SSH_20201101T043523_20201101T043550_024066_02DBF6_2014-SLC	S1A_IW_SLC__1SSH_20201107T043605_20201107T043632_035137_0419E0_186A-SLC
S1B_IW_SLC__1SSH_20201101T043523_20201101T043550_024066_02DBF6_2014-SLC	S1A_IW_SLC__1SSH_20201107T043605_20201107T043632_035137_0419E0_186A-SLC	S1A_IW_SLC__1SSH_20201107T043605_20201107T043632_035137_0419E0_186A-SLC	S1B_IW_SLC__1SSH_20201113T043523_20201113T043550_024241_02E167_12D3-SLC
S1A_IW_SLC__1SSH_20201107T043605_20201107T043632_035137_0419E0_186A-SLC	S1B_IW_SLC__1SSH_20201113T043523_20201113T043550_024241_02E167_12D3-SLC	S1B_IW_SLC__1SSH_20201113T043523_20201113T043550_024241_02E167_12D3-SLC	S1A_IW_SLC__1SSH_20201119T043605_20201119T043632_035312_041FFA_0F68-SLC
S1B_IW_SLC__1SSH_20201113T043523_20201113T043550_024241_02E167_12D3-SLC	S1A_IW_SLC__1SSH_20201119T043605_20201119T043632_035312_041FFA_0F68-SLC	S1A_IW_SLC__1SSH_20201119T043605_20201119T043632_035312_041FFA_0F68-SLC	S1B_IW_SLC__1SSH_20201125T043523_20201125T043549_024416_02E6EC_B0CF-SLC
S1A_IW_SLC__1SSH_20201119T043605_20201119T043632_035312_041FFA_0F68-SLC	S1B_IW_SLC__1SSH_20201125T043523_20201125T043549_024416_02E6EC_B0CF-SLC	S1B_IW_SLC__1SSH_20201125T043523_20201125T043549_024416_02E6EC_B0CF-SLC	S1A_IW_SLC__1SSH_20201201T043604_20201201T043631_035487_04260F_887A-SLC
S1B_IW_SLC__1SSH_20201125T043523_20201125T043549_024416_02E6EC_B0CF-SLC	S1A_IW_SLC__1SSH_20201201T043604_20201201T043631_035487_04260F_887A-SLC	S1A_IW_SLC__1SSH_20201201T043604_20201201T043631_035487_04260F_887A-SLC	S1B_IW_SLC__1SSH_20201207T043522_20201207T043549_024591_02EC88_FC1F-SLC
S1A_IW_SLC__1SSH_20201201T043604_20201201T043631_035487_04260F_887A-SLC	S1B_IW_SLC__1SSH_20201207T043522_20201207T043549_024591_02EC88_FC1F-SLC	S1B_IW_SLC__1SSH_20201207T043522_20201207T043549_024591_02EC88_FC1F-SLC	S1A_IW_SLC__1SSH_20201213T043604_20201213T043631_035662_042C0A_137F-SLC
S1B_IW_SLC__1SSH_20201207T043522_20201207T043549_024591_02EC88_FC1F-SLC	S1A_IW_SLC__1SSH_20201213T043604_20201213T043631_035662_042C0A_137F-SLC	S1A_IW_SLC__1SSH_20201213T043604_20201213T043631_035662_042C0A_137F-SLC	S1B_IW_SLC__1SSH_20201219T043522_20201219T043549_024766_02F22F_53AF-SLC
S1A_IW_SLC__1SSH_20201213T043604_20201213T043631_035662_042C0A_137F-SLC	S1B_IW_SLC__1SSH_20201219T043522_20201219T043549_024766_02F22F_53AF-SLC	S1B_IW_SLC__1SSH_20201219T043522_20201219T043549_024766_02F22F_53AF-SLC	S1A_IW_SLC__1SSH_20201225T043603_20201225T043630_035837_043211_3ED1-SLC
S1B_IW_SLC__1SSH_20201219T043522_20201219T043549_024766_02F22F_53AF-SLC	S1A_IW_SLC__1SSH_20201225T043603_20201225T043630_035837_043211_3ED1-SLC	S1A_IW_SLC__1SSH_20201225T043603_20201225T043630_035837_043211_3ED1-SLC	S1B_IW_SLC__1SSH_20201231T043521_20201231T043548_024941_02F7D4_0C62-SLC
S1A_IW_SLC__1SSH_20201225T043603_20201225T043630_035837_043211_3ED1-SLC	S1B_IW_SLC__1SSH_20201231T043521_20201231T043548_024941_02F7D4_0C62-SLC	S1B_IW_SLC__1SSH_20201231T043521_20201231T043548_024941_02F7D4_0C62-SLC	S1A_IW_SLC__1SSH_20210106T043602_20210106T043629_036012_04382E_CD8D-SLC
S1B_IW_SLC__1SSH_20201231T043521_20201231T043548_024941_02F7D4_0C62-SLC	S1A_IW_SLC__1SSH_20210106T043602_20210106T043629_036012_04382E_CD8D-SLC	S1A_IW_SLC__1SSH_20210106T043602_20210106T043629_036012_04382E_CD8D-SLC	S1B_IW_SLC__1SSH_20210112T043520_20210112T043547_025116_02FD76_306F-SLC
S1A_IW_SLC__1SSH_20210106T043602_20210106T043629_036012_04382E_CD8D-SLC	S1B_IW_SLC__1SSH_20210112T043520_20210112T043547_025116_02FD76_306F-SLC	S1B_IW_SLC__1SSH_20210112T043520_20210112T043547_025116_02FD76_306F-SLC	S1A_IW_SLC__1SSH_20210118T043602_20210118T043629_036187_043E50_C47F-SLC
S1B_IW_SLC__1SSH_20210112T043520_20210112T043547_025116_02FD76_306F-SLC	S1A_IW_SLC__1SSH_20210118T043602_20210118T043629_036187_043E50_C47F-SLC	S1A_IW_SLC__1SSH_20210118T043602_20210118T043629_036187_043E50_C47F-SLC	S1B_IW_SLC__1SSH_20210124T043520_20210124T043547_025291_030304_16F4-SLC
S1A_IW_SLC__1SSH_20210118T043602_20210118T043629_036187_043E50_C47F-SLC	S1B_IW_SLC__1SSH_20210124T043520_20210124T043547_025291_030304_16F4-SLC	S1B_IW_SLC__1SSH_20210124T043520_20210124T043547_025291_030304_16F4-SLC	S1A_IW_SLC__1SSH_20210130T043602_20210130T043629_036362_044465_DD01-SLC
S1B_IW_SLC__1SSH_20210124T043520_20210124T043547_025291_030304_16F4-SLC	S1A_IW_SLC__1SSH_20210130T043602_20210130T043629_036362_044465_DD01-SLC	S1A_IW_SLC__1SSH_20210130T043602_20210130T043629_036362_044465_DD01-SLC	S1B_IW_SLC__1SSH_20210205T043520_20210205T043546_025466_0308AE_351C-SLC
S1A_IW_SLC__1SSH_20210130T043602_20210130T043629_036362_044465_DD01-SLC	S1B_IW_SLC__1SSH_20210205T043520_20210205T043546_025466_0308AE_351C-SLC	S1B_IW_SLC__1SSH_20210205T043520_20210205T043546_025466_0308AE_351C-SLC	S1A_IW_SLC__1SSH_20210211T043601_20210211T043628_036537_044A72_2CE8-SLC
S1B_IW_SLC__1SSH_20210205T043520_20210205T043546_025466_0308AE_351C-SLC	S1A_IW_SLC__1SSH_20210211T043601_20210211T043628_036537_044A72_2CE8-SLC	S1A_IW_SLC__1SSH_20210211T043601_20210211T043628_036537_044A72_2CE8-SLC	S1B_IW_SLC__1SSH_20210217T043519_20210217T043546_025641_030E65_5EA1-SLC
S1A_IW_SLC__1SSH_20210211T043601_20210211T043628_036537_044A72_2CE8-SLC	S1B_IW_SLC__1SSH_20210217T043519_20210217T043546_025641_030E65_5EA1-SLC	S1B_IW_SLC__1SSH_20210217T043519_20210217T043546_025641_030E65_5EA1-SLC	S1A_IW_SLC__1SSH_20210223T043601_20210223T043628_036712_045090_24F7-SLC
S1B_IW_SLC__1SSH_20210217T043519_20210217T043546_025641_030E65_5EA1-SLC	S1A_IW_SLC__1SSH_20210223T043601_20210223T043628_036712_045090_24F7-SLC	S1A_IW_SLC__1SSH_20210223T043601_20210223T043628_036712_045090_24F7-SLC	S1B_IW_SLC__1SSH_20210301T043519_20210301T043546_025816_031416_8496-SLC
S1A_IW_SLC__1SSH_20210223T043601_20210223T043628_036712_045090_24F7-SLC	S1B_IW_SLC__1SSH_20210301T043519_20210301T043546_025816_031416_8496-SLC	S1B_IW_SLC__1SSH_20210301T043519_20210301T043546_025816_031416_8496-SLC	S1A_IW_SLC__1SSH_20210307T043601_20210307T043628_036887_0456AC_4CB1-SLC
S1B_IW_SLC__1SSH_20210301T043519_20210301T043546_025816_031416_8496-SLC	S1A_IW_SLC__1SSH_20210307T043601_20210307T043628_036887_0456AC_4CB1-SLC	S1A_IW_SLC__1SSH_20210307T043601_20210307T043628_036887_0456AC_4CB1-SLC	S1B_IW_SLC__1SSH_20210313T043519_20210313T043546_025991_0319C7_5101-SLC
S1A_IW_SLC__1SSH_20210307T043601_20210307T043628_036887_0456AC_4CB1-SLC	S1B_IW_SLC__1SSH_20210313T043519_20210313T043546_025991_0319C7_5101-SLC	S1B_IW_SLC__1SSH_20210313T043519_20210313T043546_025991_0319C7_5101-SLC	S1A_IW_SLC__1SSH_20210319T043601_20210319T043628_037062_045CC5_57FC-SLC
S1B_IW_SLC__1SSH_20210313T043519_20210313T043546_025991_0319C7_5101-SLC	S1A_IW_SLC__1SSH_20210319T043601_20210319T043628_037062_045CC5_57FC-SLC	S1A_IW_SLC__1SSH_20210319T043601_20210319T043628_037062_045CC5_57FC-SLC	S1B_IW_SLC__1SSH_20210325T043519_20210325T043546_026166_031F57_FD9B-SLC
S1A_IW_SLC__1SSH_20210319T043601_20210319T043628_037062_045CC5_57FC-SLC	S1B_IW_SLC__1SSH_20210325T043519_20210325T043546_026166_031F57_FD9B-SLC	S1B_IW_SLC__1SSH_20210325T043519_20210325T043546_026166_031F57_FD9B-SLC	S1A_IW_SLC__1SSH_20210331T043601_20210331T043628_037237_0462D1_472C-SLC
S1B_IW_SLC__1SSH_20210325T043519_20210325T043546_026166_031F57_FD9B-SLC	S1A_IW_SLC__1SSH_20210331T043601_20210331T043628_037237_0462D1_472C-SLC	S1A_IW_SLC__1SSH_20210331T043601_20210331T043628_037237_0462D1_472C-SLC	S1B_IW_SLC__1SSH_20210406T043520_20210406T043547_026341_0324F5_07EC-SLC
S1A_IW_SLC__1SSH_20210331T043601_20210331T043628_037237_0462D1_472C-SLC	S1B_IW_SLC__1SSH_20210406T043520_20210406T043547_026341_0324F5_07EC-SLC	S1B_IW_SLC__1SSH_20210406T043520_20210406T043547_026341_0324F5_07EC-SLC	S1A_IW_SLC__1SSH_20210412T043602_20210412T043629_037412_0468DB_01B5-SLC
S1B_IW_SLC__1SSH_20210406T043520_20210406T043547_026341_0324F5_07EC-SLC	S1A_IW_SLC__1SSH_20210412T043602_20210412T043629_037412_0468DB_01B5-SLC	S1A_IW_SLC__1SSH_20210412T043602_20210412T043629_037412_0468DB_01B5-SLC	S1B_IW_SLC__1SSH_20210418T043520_20210418T043547_026516_032A87_BEB7-SLC
S1A_IW_SLC__1SSH_20210412T043602_20210412T043629_037412_0468DB_01B5-SLC	S1B_IW_SLC__1SSH_20210418T043520_20210418T043547_026516_032A87_BEB7-SLC	S1B_IW_SLC__1SSH_20210418T043520_20210418T043547_026516_032A87_BEB7-SLC	S1A_IW_SLC__1SSH_20210424T043602_20210424T043629_037587_046EE4_71D2-SLC
S1B_IW_SLC__1SSH_20210418T043520_20210418T043547_026516_032A87_BEB7-SLC	S1A_IW_SLC__1SSH_20210424T043602_20210424T043629_037587_046EE4_71D2-SLC	S1A_IW_SLC__1SSH_20210424T043602_20210424T043629_037587_046EE4_71D2-SLC	S1B_IW_SLC__1SSH_20210430T043521_20210430T043548_026691_033022_317A-SLC
S1A_IW_SLC__1SSH_20210424T043602_20210424T043629_037587_046EE4_71D2-SLC	S1B_IW_SLC__1SSH_20210430T043521_20210430T043548_026691_033022_317A-SLC	S1B_IW_SLC__1SSH_20210430T043521_20210430T043548_026691_033022_317A-SLC	S1A_IW_SLC__1SSH_20210506T043603_20210506T043630_037762_0474EF_39FC-SLC
S1B_IW_SLC__1SSH_20210430T043521_20210430T043548_026691_033022_317A-SLC	S1A_IW_SLC__1SSH_20210506T043603_20210506T043630_037762_0474EF_39FC-SLC	S1A_IW_SLC__1SSH_20210506T043603_20210506T043630_037762_0474EF_39FC-SLC	S1B_IW_SLC__1SSH_20210512T043521_20210512T043548_026866_0335B0_B985-SLC
S1A_IW_SLC__1SSH_20210506T043603_20210506T043630_037762_0474EF_39FC-SLC	S1B_IW_SLC__1SSH_20210512T043521_20210512T043548_026866_0335B0_B985-SLC	S1B_IW_SLC__1SSH_20210512T043521_20210512T043548_026866_0335B0_B985-SLC	S1A_IW_SLC__1SSH_20210518T043603_20210518T043630_037937_047A36_2866-SLC
S1B_IW_SLC__1SSH_20210512T043521_20210512T043548_026866_0335B0_B985-SLC	S1A_IW_SLC__1SSH_20210518T043603_20210518T043630_037937_047A36_2866-SLC	S1A_IW_SLC__1SSH_20210518T043603_20210518T043630_037937_047A36_2866-SLC	S1B_IW_SLC__1SSH_20210524T043522_20210524T043549_027041_033B0D_B90F-SLC
S1A_IW_SLC__1SSH_20210518T043603_20210518T043630_037937_047A36_2866-SLC	S1B_IW_SLC__1SSH_20210524T043522_20210524T043549_027041_033B0D_B90F-SLC	S1B_IW_SLC__1SSH_20210524T043522_20210524T043549_027041_033B0D_B90F-SLC	S1A_IW_SLC__1SSH_20210530T043604_20210530T043631_038112_047F7A_F2D4-SLC
S1B_IW_SLC__1SSH_20210524T043522_20210524T043549_027041_033B0D_B90F-SLC	S1A_IW_SLC__1SSH_20210530T043604_20210530T043631_038112_047F7A_F2D4-SLC	S1A_IW_SLC__1SSH_20210530T043604_20210530T043631_038112_047F7A_F2D4-SLC	S1B_IW_SLC__1SSH_20210605T043523_20210605T043550_027216_034047_6F7E-SLC
S1A_IW_SLC__1SSH_20210530T043604_20210530T043631_038112_047F7A_F2D4-SLC	S1B_IW_SLC__1SSH_20210605T043523_20210605T043550_027216_034047_6F7E-SLC	S1B_IW_SLC__1SSH_20210605T043523_20210605T043550_027216_034047_6F7E-SLC	S1A_IW_SLC__1SSH_20210611T043605_20210611T043632_038287_0484A7_A831-SLC
S1B_IW_SLC__1SSH_20210605T043523_20210605T043550_027216_034047_6F7E-SLC	S1A_IW_SLC__1SSH_20210611T043605_20210611T043632_038287_0484A7_A831-SLC	S1A_IW_SLC__1SSH_20210611T043605_20210611T043632_038287_0484A7_A831-SLC	S1B_IW_SLC__1SSH_20210617T043523_20210617T043550_027391_034582_99B5-SLC
S1A_IW_SLC__1SSH_20210611T043605_20210611T043632_038287_0484A7_A831-SLC	S1B_IW_SLC__1SSH_20210617T043523_20210617T043550_027391_034582_99B5-SLC	S1B_IW_SLC__1SSH_20210617T043523_20210617T043550_027391_034582_99B5-SLC	S1A_IW_SLC__1SSH_20210623T043605_20210623T043632_038462_0489DD_B2DF-SLC
S1B_IW_SLC__1SSH_20210617T043523_20210617T043550_027391_034582_99B5-SLC	S1A_IW_SLC__1SSH_20210623T043605_20210623T043632_038462_0489DD_B2DF-SLC	S1A_IW_SLC__1SSH_20210623T043605_20210623T043632_038462_0489DD_B2DF-SLC	S1B_IW_SLC__1SSH_20210629T043524_20210629T043551_027566_034A6E_DD98-SLC
S1A_IW_SLC__1SSH_20210623T043605_20210623T043632_038462_0489DD_B2DF-SLC	S1B_IW_SLC__1SSH_20210629T043524_20210629T043551_027566_034A6E_DD98-SLC	S1B_IW_SLC__1SSH_20210629T043524_20210629T043551_027566_034A6E_DD98-SLC	S1A_IW_SLC__1SSH_20210705T043606_20210705T043633_038637_048F27_DD23-SLC
S1B_IW_SLC__1SSH_20210629T043524_20210629T043551_027566_034A6E_DD98-SLC	S1A_IW_SLC__1SSH_20210705T043606_20210705T043633_038637_048F27_DD23-SLC	S1A_IW_SLC__1SSH_20210705T043606_20210705T043633_038637_048F27_DD23-SLC	S1B_IW_SLC__1SSH_20210711T043525_20210711T043552_027741_034F8C_ABA1-SLC
S1A_IW_SLC__1SSH_20210705T043606_20210705T043633_038637_048F27_DD23-SLC	S1B_IW_SLC__1SSH_20210711T043525_20210711T043552_027741_034F8C_ABA1-SLC	S1B_IW_SLC__1SSH_20210711T043525_20210711T043552_027741_034F8C_ABA1-SLC	S1A_IW_SLC__1SSH_20210717T043607_20210717T043634_038812_049464_E75F-SLC
S1B_IW_SLC__1SSH_20210711T043525_20210711T043552_027741_034F8C_ABA1-SLC	S1A_IW_SLC__1SSH_20210717T043607_20210717T043634_038812_049464_E75F-SLC	S1A_IW_SLC__1SSH_20210717T043607_20210717T043634_038812_049464_E75F-SLC	S1B_IW_SLC__1SSH_20210723T043525_20210723T043552_027916_0354BC_6BE4-SLC
S1A_IW_SLC__1SSH_20210717T043607_20210717T043634_038812_049464_E75F-SLC	S1B_IW_SLC__1SSH_20210723T043525_20210723T043552_027916_0354BC_6BE4-SLC	S1B_IW_SLC__1SSH_20210723T043525_20210723T043552_027916_0354BC_6BE4-SLC	S1A_IW_SLC__1SSH_20210729T043608_20210729T043635_038987_049996_0AF9-SLC
S1B_IW_SLC__1SSH_20210723T043525_20210723T043552_027916_0354BC_6BE4-SLC	S1A_IW_SLC__1SSH_20210729T043608_20210729T043635_038987_049996_0AF9-SLC	S1A_IW_SLC__1SSH_20210729T043608_20210729T043635_038987_049996_0AF9-SLC	S1B_IW_SLC__1SSH_20210804T043526_20210804T043553_028091_0359E4_95F6-SLC
S1A_IW_SLC__1SSH_20210729T043608_20210729T043635_038987_049996_0AF9-SLC	S1B_IW_SLC__1SSH_20210804T043526_20210804T043553_028091_0359E4_95F6-SLC	S1B_IW_SLC__1SSH_20210804T043526_20210804T043553_028091_0359E4_95F6-SLC	S1A_IW_SLC__1SSH_20210810T043608_20210810T043635_039162_049F4D_8B6C-SLC
S1B_IW_SLC__1SSH_20210804T043526_20210804T043553_028091_0359E4_95F6-SLC	S1A_IW_SLC__1SSH_20210810T043608_20210810T043635_039162_049F4D_8B6C-SLC	S1A_IW_SLC__1SSH_20210810T043608_20210810T043635_039162_049F4D_8B6C-SLC	S1A_IW_SLC__1SSH_20210822T043609_20210822T043636_039337_04A550_78CB-SLC
S1A_IW_SLC__1SSH_20210810T043608_20210810T043635_039162_049F4D_8B6C-SLC	S1A_IW_SLC__1SSH_20210822T043609_20210822T043636_039337_04A550_78CB-SLC	S1A_IW_SLC__1SSH_20210822T043609_20210822T043636_039337_04A550_78CB-SLC	S1B_IW_SLC__1SSH_20210828T043527_20210828T043554_028441_0364C8_2F8C-SLC
S1A_IW_SLC__1SSH_20210822T043609_20210822T043636_039337_04A550_78CB-SLC	S1B_IW_SLC__1SSH_20210828T043527_20210828T043554_028441_0364C8_2F8C-SLC	S1B_IW_SLC__1SSH_20210828T043527_20210828T043554_028441_0364C8_2F8C-SLC	S1A_IW_SLC__1SSH_20210903T043609_20210903T043636_039512_04AB53_2ACB-SLC
S1B_IW_SLC__1SSH_20210828T043527_20210828T043554_028441_0364C8_2F8C-SLC	S1A_IW_SLC__1SSH_20210903T043609_20210903T043636_039512_04AB53_2ACB-SLC	S1A_IW_SLC__1SSH_20210903T043609_20210903T043636_039512_04AB53_2ACB-SLC	S1B_IW_SLC__1SSH_20210909T043528_20210909T043555_028616_036A41_7C44-SLC
S1A_IW_SLC__1SSH_20210903T043609_20210903T043636_039512_04AB53_2ACB-SLC	S1B_IW_SLC__1SSH_20210909T043528_20210909T043555_028616_036A41_7C44-SLC	S1B_IW_SLC__1SSH_20210909T043528_20210909T043555_028616_036A41_7C44-SLC	S1A_IW_SLC__1SSH_20210915T043610_20210915T043637_039687_04B169_8E33-SLC
S1B_IW_SLC__1SSH_20210909T043528_20210909T043555_028616_036A41_7C44-SLC	S1A_IW_SLC__1SSH_20210915T043610_20210915T043637_039687_04B169_8E33-SLC	S1A_IW_SLC__1SSH_20210915T043610_20210915T043637_039687_04B169_8E33-SLC	S1B_IW_SLC__1SSH_20210921T043528_20210921T043555_028791_036F9E_C089-SLC
S1A_IW_SLC__1SSH_20210915T043610_20210915T043637_039687_04B169_8E33-SLC	S1B_IW_SLC__1SSH_20210921T043528_20210921T043555_028791_036F9E_C089-SLC	S1B_IW_SLC__1SSH_20210921T043528_20210921T043555_028791_036F9E_C089-SLC	S1A_IW_SLC__1SSH_20210927T043611_20210927T043637_039862_04B748_4C68-SLC
S1B_IW_SLC__1SSH_20210921T043528_20210921T043555_028791_036F9E_C089-SLC	S1A_IW_SLC__1SSH_20210927T043611_20210927T043637_039862_04B748_4C68-SLC	S1A_IW_SLC__1SSH_20210927T043611_20210927T043637_039862_04B748_4C68-SLC	S1B_IW_SLC__1SSH_20211003T043529_20211003T043556_028966_0374E8_0663-SLC
S1A_IW_SLC__1SSH_20210927T043611_20210927T043637_039862_04B748_4C68-SLC	S1B_IW_SLC__1SSH_20211003T043529_20211003T043556_028966_0374E8_0663-SLC	S1B_IW_SLC__1SSH_20211003T043529_20211003T043556_028966_0374E8_0663-SLC	S1A_IW_SLC__1SSH_20211009T043611_20211009T043638_040037_04BD56_91D6-SLC
S1B_IW_SLC__1SSH_20211003T043529_20211003T043556_028966_0374E8_0663-SLC	S1A_IW_SLC__1SSH_20211009T043611_20211009T043638_040037_04BD56_91D6-SLC	S1A_IW_SLC__1SSH_20211009T043611_20211009T043638_040037_04BD56_91D6-SLC	S1B_IW_SLC__1SSH_20211015T043529_20211015T043556_029141_037A45_7AB5-SLC
S1A_IW_SLC__1SSH_20211009T043611_20211009T043638_040037_04BD56_91D6-SLC	S1B_IW_SLC__1SSH_20211015T043529_20211015T043556_029141_037A45_7AB5-SLC	S1B_IW_SLC__1SSH_20211015T043529_20211015T043556_029141_037A45_7AB5-SLC	S1A_IW_SLC__1SSH_20211021T043611_20211021T043638_040212_04C36A_5112-SLC
S1B_IW_SLC__1SSH_20211015T043529_20211015T043556_029141_037A45_7AB5-SLC	S1A_IW_SLC__1SSH_20211021T043611_20211021T043638_040212_04C36A_5112-SLC	S1A_IW_SLC__1SSH_20211021T043611_20211021T043638_040212_04C36A_5112-SLC	S1B_IW_SLC__1SSH_20211027T043529_20211027T043556_029316_037FB4_A6C2-SLC
S1A_IW_SLC__1SSH_20211021T043611_20211021T043638_040212_04C36A_5112-SLC	S1B_IW_SLC__1SSH_20211027T043529_20211027T043556_029316_037FB4_A6C2-SLC	S1B_IW_SLC__1SSH_20211027T043529_20211027T043556_029316_037FB4_A6C2-SLC	S1B_IW_SLC__1SSH_20211108T043529_20211108T043556_029491_038509_3E0A-SLC
S1B_IW_SLC__1SSH_20211027T043529_20211027T043556_029316_037FB4_A6C2-SLC	S1B_IW_SLC__1SSH_20211108T043529_20211108T043556_029491_038509_3E0A-SLC	S1B_IW_SLC__1SSH_20211108T043529_20211108T043556_029491_038509_3E0A-SLC	S1A_IW_SLC__1SSH_20211114T043610_20211114T043637_040562_04CFA2_DB3A-SLC
S1B_IW_SLC__1SSH_20211108T043529_20211108T043556_029491_038509_3E0A-SLC	S1A_IW_SLC__1SSH_20211114T043610_20211114T043637_040562_04CFA2_DB3A-SLC	S1A_IW_SLC__1SSH_20211114T043610_20211114T043637_040562_04CFA2_DB3A-SLC	S1B_IW_SLC__1SSH_20211120T043528_20211120T043555_029666_038A65_7A1B-SLC
S1A_IW_SLC__1SSH_20211114T043610_20211114T043637_040562_04CFA2_DB3A-SLC	S1B_IW_SLC__1SSH_20211120T043528_20211120T043555_029666_038A65_7A1B-SLC	S1B_IW_SLC__1SSH_20211120T043528_20211120T043555_029666_038A65_7A1B-SLC	S1A_IW_SLC__1SSH_20211126T043610_20211126T043637_040737_04D5A4_BB3B-SLC
S1B_IW_SLC__1SSH_20211120T043528_20211120T043555_029666_038A65_7A1B-SLC	S1A_IW_SLC__1SSH_20211126T043610_20211126T043637_040737_04D5A4_BB3B-SLC	S1A_IW_SLC__1SSH_20211126T043610_20211126T043637_040737_04D5A4_BB3B-SLC	S1B_IW_SLC__1SSH_20211202T043528_20211202T043555_029841_038FEE_1AA6-SLC
S1A_IW_SLC__1SSH_20211126T043610_20211126T043637_040737_04D5A4_BB3B-SLC	S1B_IW_SLC__1SSH_20211202T043528_20211202T043555_029841_038FEE_1AA6-SLC	S1B_IW_SLC__1SSH_20211202T043528_20211202T043555_029841_038FEE_1AA6-SLC	S1A_IW_SLC__1SSH_20211208T043609_20211208T043636_040912_04DBBB_0D7D-SLC
S1B_IW_SLC__1SSH_20211202T043528_20211202T043555_029841_038FEE_1AA6-SLC	S1A_IW_SLC__1SSH_20211208T043609_20211208T043636_040912_04DBBB_0D7D-SLC	S1A_IW_SLC__1SSH_20211208T043609_20211208T043636_040912_04DBBB_0D7D-SLC	S1B_IW_SLC__1SSH_20211214T043527_20211214T043554_030016_039573_05D2-SLC
S1A_IW_SLC__1SSH_20211208T043609_20211208T043636_040912_04DBBB_0D7D-SLC	S1B_IW_SLC__1SSH_20211214T043527_20211214T043554_030016_039573_05D2-SLC	S1B_IW_SLC__1SSH_20211214T043527_20211214T043554_030016_039573_05D2-SLC	S1A_IW_SLC__1SSH_20211220T043609_20211220T043636_041087_04E193_8BEC-SLC
S1B_IW_SLC__1SSH_20211214T043527_20211214T043554_030016_039573_05D2-SLC	S1A_IW_SLC__1SSH_20211220T043609_20211220T043636_041087_04E193_8BEC-SLC	S1A_IW_SLC__1SSH_20211220T043609_20211220T043636_041087_04E193_8BEC-SLC	S1A_IW_SLC__1SSH_20220101T043608_20220101T043635_041262_04E772_69DD-SLC
S1A_IW_SLC__1SSH_20211220T043609_20211220T043636_041087_04E193_8BEC-SLC	S1A_IW_SLC__1SSH_20220101T043608_20220101T043635_041262_04E772_69DD-SLC	S1A_IW_SLC__1SSH_20220101T043608_20220101T043635_041262_04E772_69DD-SLC	S1A_IW_SLC__1SSH_20220113T043608_20220113T043635_041437_04ED4E_1CC1-SLC
S1A_IW_SLC__1SSH_20220101T043608_20220101T043635_041262_04E772_69DD-SLC	S1A_IW_SLC__1SSH_20220113T043608_20220113T043635_041437_04ED4E_1CC1-SLC	S1A_IW_SLC__1SSH_20220113T043608_20220113T043635_041437_04ED4E_1CC1-SLC	S1A_IW_SLC__1SSH_20220125T043607_20220125T043634_041612_04F32B_5F4E-SLC
S1A_IW_SLC__1SSH_20220113T043608_20220113T043635_041437_04ED4E_1CC1-SLC	S1A_IW_SLC__1SSH_20220125T043607_20220125T043634_041612_04F32B_5F4E-SLC	S1A_IW_SLC__1SSH_20220125T043607_20220125T043634_041612_04F32B_5F4E-SLC	S1A_IW_SLC__1SSH_20220206T043607_20220206T043634_041787_04F92F_50A6-SLC
S1A_IW_SLC__1SSH_20220125T043607_20220125T043634_041612_04F32B_5F4E-SLC	S1A_IW_SLC__1SSH_20220206T043607_20220206T043634_041787_04F92F_50A6-SLC	S1A_IW_SLC__1SSH_20220206T043607_20220206T043634_041787_04F92F_50A6-SLC	S1A_IW_SLC__1SSH_20220218T043607_20220218T043634_041962_04FF46_D51B-SLC
S1A_IW_SLC__1SSH_20220206T043607_20220206T043634_041787_04F92F_50A6-SLC	S1A_IW_SLC__1SSH_20220218T043607_20220218T043634_041962_04FF46_D51B-SLC	S1A_IW_SLC__1SSH_20220218T043607_20220218T043634_041962_04FF46_D51B-SLC	S1A_IW_SLC__1SSH_20220314T043607_20220314T043634_042312_050B33_606E-SLC
S1A_IW_SLC__1SSH_20220218T043607_20220218T043634_041962_04FF46_D51B-SLC	S1A_IW_SLC__1SSH_20220314T043607_20220314T043634_042312_050B33_606E-SLC	S1A_IW_SLC__1SSH_20220314T043607_20220314T043634_042312_050B33_606E-SLC	S1A_IW_SLC__1SSH_20220326T043607_20220326T043634_042487_051128_0AC6-SLC
S1A_IW_SLC__1SSH_20220314T043607_20220314T043634_042312_050B33_606E-SLC	S1A_IW_SLC__1SSH_20220326T043607_20220326T043634_042487_051128_0AC6-SLC	S1A_IW_SLC__1SSH_20220326T043607_20220326T043634_042487_051128_0AC6-SLC	S1A_IW_SLC__1SSH_20220407T043607_20220407T043634_042662_05170E_BE73-SLC
S1A_IW_SLC__1SSH_20220326T043607_20220326T043634_042487_051128_0AC6-SLC	S1A_IW_SLC__1SSH_20220407T043607_20220407T043634_042662_05170E_BE73-SLC	S1A_IW_SLC__1SSH_20220407T043607_20220407T043634_042662_05170E_BE73-SLC	S1A_IW_SLC__1SSH_20220419T043608_20220419T043635_042837_051CEC_883C-SLC
S1A_IW_SLC__1SSH_20220407T043607_20220407T043634_042662_05170E_BE73-SLC	S1A_IW_SLC__1SSH_20220419T043608_20220419T043635_042837_051CEC_883C-SLC	S1A_IW_SLC__1SSH_20220419T043608_20220419T043635_042837_051CEC_883C-SLC	S1A_IW_SLC__1SSH_20220501T043608_20220501T043635_043012_0522B5_FA42-SLC
S1A_IW_SLC__1SSH_20220419T043608_20220419T043635_042837_051CEC_883C-SLC	S1A_IW_SLC__1SSH_20220501T043608_20220501T043635_043012_0522B5_FA42-SLC	S1A_IW_SLC__1SSH_20220501T043608_20220501T043635_043012_0522B5_FA42-SLC	S1A_IW_SLC__1SSH_20220513T043609_20220513T043636_043187_052865_598E-SLC
S1A_IW_SLC__1SSH_20220501T043608_20220501T043635_043012_0522B5_FA42-SLC	S1A_IW_SLC__1SSH_20220513T043609_20220513T043636_043187_052865_598E-SLC	S1A_IW_SLC__1SSH_20220513T043609_20220513T043636_043187_052865_598E-SLC	S1A_IW_SLC__1SSH_20220525T043609_20220525T043636_043362_052D9C_4EE6-SLC
S1A_IW_SLC__1SSH_20220513T043609_20220513T043636_043187_052865_598E-SLC	S1A_IW_SLC__1SSH_20220525T043609_20220525T043636_043362_052D9C_4EE6-SLC	S1A_IW_SLC__1SSH_20220606T043611_20220606T043638_043537_0532C9_4AB0-SLC	S1A_IW_SLC__1SSH_20220618T043611_20220618T043638_043712_0537FD_5503-SLC
S1A_IW_SLC__1SSH_20220606T043611_20220606T043638_043537_0532C9_4AB0-SLC	S1A_IW_SLC__1SSH_20220618T043611_20220618T043638_043712_0537FD_5503-SLC	S1A_IW_SLC__1SSH_20220618T043611_20220618T043638_043712_0537FD_5503-SLC	S1A_IW_SLC__1SSH_20220630T043612_20220630T043639_043887_053D3B_899C-SLC
S1A_IW_SLC__1SSH_20220618T043611_20220618T043638_043712_0537FD_5503-SLC	S1A_IW_SLC__1SSH_20220630T043612_20220630T043639_043887_053D3B_899C-SLC	S1A_IW_SLC__1SSH_20220630T043612_20220630T043639_043887_053D3B_899C-SLC	S1A_IW_SLC__1SSH_20220712T043613_20220712T043640_044062_054271_F7BA-SLC
S1A_IW_SLC__1SSH_20220630T043612_20220630T043639_043887_053D3B_899C-SLC	S1A_IW_SLC__1SSH_20220712T043613_20220712T043640_044062_054271_F7BA-SLC	S1A_IW_SLC__1SSH_20220712T043613_20220712T043640_044062_054271_F7BA-SLC	S1A_IW_SLC__1SSH_20220724T043614_20220724T043641_044237_0547AB_4989-SLC
S1A_IW_SLC__1SSH_20220712T043613_20220712T043640_044062_054271_F7BA-SLC	S1A_IW_SLC__1SSH_20220724T043614_20220724T043641_044237_0547AB_4989-SLC	S1A_IW_SLC__1SSH_20220724T043614_20220724T043641_044237_0547AB_4989-SLC	S1A_IW_SLC__1SSH_20220805T043614_20220805T043641_044412_054CCF_80B7-SLC
S1A_IW_SLC__1SSH_20220724T043614_20220724T043641_044237_0547AB_4989-SLC	S1A_IW_SLC__1SSH_20220805T043614_20220805T043641_044412_054CCF_80B7-SLC	S1A_IW_SLC__1SSH_20220805T043614_20220805T043641_044412_054CCF_80B7-SLC	S1A_IW_SLC__1SSH_20220817T043615_20220817T043642_044587_05526A_3535-SLC
S1A_IW_SLC__1SSH_20220805T043614_20220805T043641_044412_054CCF_80B7-SLC	S1A_IW_SLC__1SSH_20220817T043615_20220817T043642_044587_05526A_3535-SLC	S1A_IW_SLC__1SSH_20220817T043615_20220817T043642_044587_05526A_3535-SLC	S1A_IW_SLC__1SSH_20220829T043616_20220829T043643_044762_055855_AE62-SLC
S1A_IW_SLC__1SSH_20220817T043615_20220817T043642_044587_05526A_3535-SLC	S1A_IW_SLC__1SSH_20220829T043616_20220829T043643_044762_055855_AE62-SLC	S1A_IW_SLC__1SSH_20220829T043616_20220829T043643_044762_055855_AE62-SLC	S1A_IW_SLC__1SSH_20220910T043616_20220910T043643_044937_055E2C_EE2C-SLC
S1A_IW_SLC__1SSH_20220829T043616_20220829T043643_044762_055855_AE62-SLC	S1A_IW_SLC__1SSH_20220910T043616_20220910T043643_044937_055E2C_EE2C-SLC	S1A_IW_SLC__1SSH_20220910T043616_20220910T043643_044937_055E2C_EE2C-SLC	S1A_IW_SLC__1SSH_20220922T043616_20220922T043642_045112_056414_6968-SLC
S1A_IW_SLC__1SSH_20220910T043616_20220910T043643_044937_055E2C_EE2C-SLC	S1A_IW_SLC__1SSH_20220922T043616_20220922T043642_045112_056414_6968-SLC	S1A_IW_SLC__1SSH_20220922T043616_20220922T043642_045112_056414_6968-SLC	S1A_IW_SLC__1SSH_20221004T043617_20221004T043644_045287_0569FB_1C45-SLC
S1A_IW_SLC__1SSH_20220922T043616_20220922T043642_045112_056414_6968-SLC	S1A_IW_SLC__1SSH_20221004T043617_20221004T043644_045287_0569FB_1C45-SLC	S1A_IW_SLC__1SSH_20221004T043617_20221004T043644_045287_0569FB_1C45-SLC	S1A_IW_SLC__1SSH_20221016T043617_20221016T043644_045462_056FC7_7F8B-SLC
S1A_IW_SLC__1SSH_20221004T043617_20221004T043644_045287_0569FB_1C45-SLC	S1A_IW_SLC__1SSH_20221016T043617_20221016T043644_045462_056FC7_7F8B-SLC	S1A_IW_SLC__1SSH_20221016T043617_20221016T043644_045462_056FC7_7F8B-SLC	S1A_IW_SLC__1SSH_20221028T043617_20221028T043644_045637_057504_264E-SLC
S1A_IW_SLC__1SSH_20221016T043617_20221016T043644_045462_056FC7_7F8B-SLC	S1A_IW_SLC__1SSH_20221028T043617_20221028T043644_045637_057504_264E-SLC	S1A_IW_SLC__1SSH_20221028T043617_20221028T043644_045637_057504_264E-SLC	S1A_IW_SLC__1SSH_20221109T043616_20221109T043643_045812_057AF5_6ED6-SLC
S1A_IW_SLC__1SSH_20221028T043617_20221028T043644_045637_057504_264E-SLC	S1A_IW_SLC__1SSH_20221109T043616_20221109T043643_045812_057AF5_6ED6-SLC	S1A_IW_SLC__1SSH_20221109T043616_20221109T043643_045812_057AF5_6ED6-SLC	S1A_IW_SLC__1SSH_20221121T043616_20221121T043643_045987_0580D6_F3A0-SLC
S1A_IW_SLC__1SSH_20221109T043616_20221109T043643_045812_057AF5_6ED6-SLC	S1A_IW_SLC__1SSH_20221121T043616_20221121T043643_045987_0580D6_F3A0-SLC	S1A_IW_SLC__1SSH_20221121T043616_20221121T043643_045987_0580D6_F3A0-SLC	S1A_IW_SLC__1SSH_20221203T043616_20221203T043643_046162_0586CD_1A09-SLC
S1A_IW_SLC__1SSH_20221121T043616_20221121T043643_045987_0580D6_F3A0-SLC	S1A_IW_SLC__1SSH_20221203T043616_20221203T043643_046162_0586CD_1A09-SLC	S1A_IW_SLC__1SSH_20221203T043616_20221203T043643_046162_0586CD_1A09-SLC	S1A_IW_SLC__1SSH_20221215T043615_20221215T043642_046337_058CBB_7C02-SLC
S1A_IW_SLC__1SSH_20221203T043616_20221203T043643_046162_0586CD_1A09-SLC	S1A_IW_SLC__1SSH_20221215T043615_20221215T043642_046337_058CBB_7C02-SLC	S1A_IW_SLC__1SSH_20221215T043615_20221215T043642_046337_058CBB_7C02-SLC	S1A_IW_SLC__1SSH_20221227T043614_20221227T043641_046512_0592BB_56B9-SLC
S1A_IW_SLC__1SSH_20221215T043615_20221215T043642_046337_058CBB_7C02-SLC	S1A_IW_SLC__1SSH_20221227T043614_20221227T043641_046512_0592BB_56B9-SLC	S1A_IW_SLC__1SSH_20221227T043614_20221227T043641_046512_0592BB_56B9-SLC	S1A_IW_SLC__1SSH_20230108T043614_20230108T043641_046687_05989A_3E9B-SLC
S1A_IW_SLC__1SSH_20221227T043614_20221227T043641_046512_0592BB_56B9-SLC	S1A_IW_SLC__1SSH_20230108T043614_20230108T043641_046687_05989A_3E9B-SLC	S1A_IW_SLC__1SSH_20230108T043614_20230108T043641_046687_05989A_3E9B-SLC	S1A_IW_SLC__1SSH_20230201T043613_20230201T043640_047037_05A462_46FA-SLC
S1A_IW_SLC__1SSH_20230108T043614_20230108T043641_046687_05989A_3E9B-SLC	S1A_IW_SLC__1SSH_20230201T043613_20230201T043640_047037_05A462_46FA-SLC	S1A_IW_SLC__1SSH_20230201T043613_20230201T043640_047037_05A462_46FA-SLC	S1A_IW_SLC__1SSH_20230213T043613_20230213T043640_047212_05AA3D_1C5B-SLC
S1A_IW_SLC__1SSH_20230201T043613_20230201T043640_047037_05A462_46FA-SLC	S1A_IW_SLC__1SSH_20230213T043613_20230213T043640_047212_05AA3D_1C5B-SLC	S1A_IW_SLC__1SSH_20230213T043613_20230213T043640_047212_05AA3D_1C5B-SLC	S1A_IW_SLC__1SSH_20230225T043612_20230225T043639_047387_05B034_ACA1-SLC
S1A_IW_SLC__1SSH_20230213T043613_20230213T043640_047212_05AA3D_1C5B-SLC	S1A_IW_SLC__1SSH_20230225T043612_20230225T043639_047387_05B034_ACA1-SLC	S1A_IW_SLC__1SSH_20230225T043612_20230225T043639_047387_05B034_ACA1-SLC	S1A_IW_SLC__1SSH_20230309T043612_20230309T043639_047562_05B61D_629F-SLC
S1A_IW_SLC__1SSH_20230225T043612_20230225T043639_047387_05B034_ACA1-SLC	S1A_IW_SLC__1SSH_20230309T043612_20230309T043639_047562_05B61D_629F-SLC	S1A_IW_SLC__1SSH_20230309T043612_20230309T043639_047562_05B61D_629F-SLC	S1A_IW_SLC__1SSH_20230321T043612_20230321T043639_047737_05BC0D_35F7-SLC
S1A_IW_SLC__1SSH_20230309T043612_20230309T043639_047562_05B61D_629F-SLC	S1A_IW_SLC__1SSH_20230321T043612_20230321T043639_047737_05BC0D_35F7-SLC	S1A_IW_SLC__1SSH_20230321T043612_20230321T043639_047737_05BC0D_35F7-SLC	S1A_IW_SLC__1SSH_20230402T043613_20230402T043640_047912_05C1E6_727D-SLC
S1A_IW_SLC__1SSH_20230321T043612_20230321T043639_047737_05BC0D_35F7-SLC	S1A_IW_SLC__1SSH_20230402T043613_20230402T043640_047912_05C1E6_727D-SLC	S1A_IW_SLC__1SSH_20230402T043613_20230402T043640_047912_05C1E6_727D-SLC	S1A_IW_SLC__1SSH_20230414T043613_20230414T043640_048087_05C7D5_8EC6-SLC
S1A_IW_SLC__1SSH_20230402T043613_20230402T043640_047912_05C1E6_727D-SLC	S1A_IW_SLC__1SSH_20230414T043613_20230414T043640_048087_05C7D5_8EC6-SLC	S1A_IW_SLC__1SSH_20230414T043613_20230414T043640_048087_05C7D5_8EC6-SLC	S1A_IW_SLC__1SSH_20230426T043614_20230426T043641_048262_05CDB5_819D-SLC
S1A_IW_SLC__1SSH_20230414T043613_20230414T043640_048087_05C7D5_8EC6-SLC	S1A_IW_SLC__1SSH_20230426T043614_20230426T043641_048262_05CDB5_819D-SLC	S1A_IW_SLC__1SSH_20230426T043614_20230426T043641_048262_05CDB5_819D-SLC	S1A_IW_SLC__1SSH_20230508T043614_20230508T043641_048437_05D391_6AD2-SLC
S1A_IW_SLC__1SSH_20230426T043614_20230426T043641_048262_05CDB5_819D-SLC	S1A_IW_SLC__1SSH_20230508T043614_20230508T043641_048437_05D391_6AD2-SLC	S1A_IW_SLC__1SSH_20230508T043614_20230508T043641_048437_05D391_6AD2-SLC	S1A_IW_SLC__1SSH_20230520T043615_20230520T043642_048612_05D8C5_8C14-SLC
S1A_IW_SLC__1SSH_20230508T043614_20230508T043641_048437_05D391_6AD2-SLC	S1A_IW_SLC__1SSH_20230520T043615_20230520T043642_048612_05D8C5_8C14-SLC	S1A_IW_SLC__1SSH_20230520T043615_20230520T043642_048612_05D8C5_8C14-SLC	S1A_IW_SLC__1SSH_20230601T043615_20230601T043642_048787_05DDFD_1D8A-SLC
S1A_IW_SLC__1SSH_20230520T043615_20230520T043642_048612_05D8C5_8C14-SLC	S1A_IW_SLC__1SSH_20230601T043615_20230601T043642_048787_05DDFD_1D8A-SLC	S1A_IW_SLC__1SSH_20230601T043615_20230601T043642_048787_05DDFD_1D8A-SLC	S1A_IW_SLC__1SSH_20230613T043616_20230613T043643_048962_05E350_4162-SLC
S1A_IW_SLC__1SSH_20230601T043615_20230601T043642_048787_05DDFD_1D8A-SLC	S1A_IW_SLC__1SSH_20230613T043616_20230613T043643_048962_05E350_4162-SLC	S1A_IW_SLC__1SSH_20230613T043616_20230613T043643_048962_05E350_4162-SLC	S1A_IW_SLC__1SSH_20230625T043617_20230625T043644_049137_05E8A3_46B4-SLC
S1A_IW_SLC__1SSH_20230613T043616_20230613T043643_048962_05E350_4162-SLC	S1A_IW_SLC__1SSH_20230625T043617_20230625T043644_049137_05E8A3_46B4-SLC	S1A_IW_SLC__1SSH_20230625T043617_20230625T043644_049137_05E8A3_46B4-SLC	S1A_IW_SLC__1SSH_20230707T043618_20230707T043645_049312_05EE05_4E35-SLC
S1A_IW_SLC__1SSH_20230625T043617_20230625T043644_049137_05E8A3_46B4-SLC	S1A_IW_SLC__1SSH_20230707T043618_20230707T043645_049312_05EE05_4E35-SLC	S1A_IW_SLC__1SSH_20230707T043618_20230707T043645_049312_05EE05_4E35-SLC	S1A_IW_SLC__1SSH_20230719T043618_20230719T043645_049487_05F362_D321-SLC
S1A_IW_SLC__1SSH_20230707T043618_20230707T043645_049312_05EE05_4E35-SLC	S1A_IW_SLC__1SSH_20230719T043618_20230719T043645_049487_05F362_D321-SLC	S1A_IW_SLC__1SSH_20230719T043618_20230719T043645_049487_05F362_D321-SLC	S1A_IW_SLC__1SSH_20230731T043619_20230731T043646_049662_05F8CD_C246-SLC
S1A_IW_SLC__1SSH_20230719T043618_20230719T043645_049487_05F362_D321-SLC	S1A_IW_SLC__1SSH_20230731T043619_20230731T043646_049662_05F8CD_C246-SLC	S1A_IW_SLC__1SSH_20230731T043619_20230731T043646_049662_05F8CD_C246-SLC	S1A_IW_SLC__1SSH_20230812T043619_20230812T043646_049837_05FE62_61BB-SLC
S1A_IW_SLC__1SSH_20230731T043619_20230731T043646_049662_05F8CD_C246-SLC	S1A_IW_SLC__1SSH_20230812T043619_20230812T043646_049837_05FE62_61BB-SLC	S1A_IW_SLC__1SSH_20230812T043619_20230812T043646_049837_05FE62_61BB-SLC	S1A_IW_SLC__1SSH_20230824T043620_20230824T043647_050012_060454_2945-SLC
S1A_IW_SLC__1SSH_20230812T043619_20230812T043646_049837_05FE62_61BB-SLC	S1A_IW_SLC__1SSH_20230824T043620_20230824T043647_050012_060454_2945-SLC	S1A_IW_SLC__1SSH_20230824T043620_20230824T043647_050012_060454_2945-SLC	S1A_IW_SLC__1SSH_20230905T043621_20230905T043648_050187_060A5E_A5BE-SLC
S1A_IW_SLC__1SSH_20230824T043620_20230824T043647_050012_060454_2945-SLC	S1A_IW_SLC__1SSH_20230905T043621_20230905T043648_050187_060A5E_A5BE-SLC	S1A_IW_SLC__1SSH_20230905T043621_20230905T043648_050187_060A5E_A5BE-SLC	S1A_IW_SLC__1SSH_20230917T043621_20230917T043648_050362_06104A_F2A3-SLC
S1A_IW_SLC__1SSH_20230905T043621_20230905T043648_050187_060A5E_A5BE-SLC	S1A_IW_SLC__1SSH_20230917T043621_20230917T043648_050362_06104A_F2A3-SLC	S1A_IW_SLC__1SSH_20230917T043621_20230917T043648_050362_06104A_F2A3-SLC	S1A_IW_SLC__1SSH_20230929T043622_20230929T043649_050537_061645_1EBC-SLC
S1A_IW_SLC__1SSH_20230917T043621_20230917T043648_050362_06104A_F2A3-SLC	S1A_IW_SLC__1SSH_20230929T043622_20230929T043649_050537_061645_1EBC-SLC	S1A_IW_SLC__1SSH_20230929T043622_20230929T043649_050537_061645_1EBC-SLC	S1A_IW_SLC__1SSH_20231011T043621_20231011T043648_050712_061C4B_89C3-SLC
S1A_IW_SLC__1SSH_20230929T043622_20230929T043649_050537_061645_1EBC-SLC	S1A_IW_SLC__1SSH_20231011T043621_20231011T043648_050712_061C4B_89C3-SLC	S1A_IW_SLC__1SSH_20231011T043621_20231011T043648_050712_061C4B_89C3-SLC	S1A_IW_SLC__1SSH_20231023T043622_20231023T043649_050887_06223D_3512-SLC
S1A_IW_SLC__1SSH_20231011T043621_20231011T043648_050712_061C4B_89C3-SLC	S1A_IW_SLC__1SSH_20231023T043622_20231023T043649_050887_06223D_3512-SLC	S1A_IW_SLC__1SSH_20231023T043622_20231023T043649_050887_06223D_3512-SLC	S1A_IW_SLC__1SSH_20231104T043621_20231104T043648_051062_06283E_64BA-SLC
S1A_IW_SLC__1SSH_20231023T043622_20231023T043649_050887_06223D_3512-SLC	S1A_IW_SLC__1SSH_20231104T043621_20231104T043648_051062_06283E_64BA-SLC	S1A_IW_SLC__1SSH_20231104T043621_20231104T043648_051062_06283E_64BA-SLC	S1A_IW_SLC__1SSH_20231116T043621_20231116T043648_051237_062E46_C5A8-SLC
S1A_IW_SLC__1SSH_20231104T043621_20231104T043648_051062_06283E_64BA-SLC	S1A_IW_SLC__1SSH_20231116T043621_20231116T043648_051237_062E46_C5A8-SLC	S1A_IW_SLC__1SSH_20231116T043621_20231116T043648_051237_062E46_C5A8-SLC	S1A_IW_SLC__1SSH_20231128T043620_20231128T043647_051412_063454_23D0-SLC
S1A_IW_SLC__1SSH_20231116T043621_20231116T043648_051237_062E46_C5A8-SLC	S1A_IW_SLC__1SSH_20231128T043620_20231128T043647_051412_063454_23D0-SLC	S1A_IW_SLC__1SSH_20231128T043620_20231128T043647_051412_063454_23D0-SLC	S1A_IW_SLC__1SSH_20231210T043620_20231210T043647_051587_063A64_12FF-SLC
S1A_IW_SLC__1SSH_20231128T043620_20231128T043647_051412_063454_23D0-SLC	S1A_IW_SLC__1SSH_20231210T043620_20231210T043647_051587_063A64_12FF-SLC	S1A_IW_SLC__1SSH_20231210T043620_20231210T043647_051587_063A64_12FF-SLC	S1A_IW_SLC__1SSH_20240103T043619_20240103T043646_051937_06467A_AD11-SLC
S1A_IW_SLC__1SSH_20231210T043620_20231210T043647_051587_063A64_12FF-SLC	S1A_IW_SLC__1SSH_20240103T043619_20240103T043646_051937_06467A_AD11-SLC
