# Supplementary material for: Ephemeral grounding on the Pine Island Ice Shelf, West Antarctica, from 2014–2023
Source: Copernicus journal article supplement (doi:10.5194/tc-20-245-2026), 2026-01-15
Supplement: Supplementary file 2 [file Table_S2.xlsx]

## Sheet: Eph_area
Ephemeral grounding area		Neap tide	Spring tide
First date of the DROT pair	Area (km2)
2016-09-29	12.96	1
2016-10-05	3.47		1
2016-11-04	22.11		1
2016-11-10	14.13	1
2017-01-03	8.13	1
2017-01-09	3.84		1
2017-01-21	13.26		1
2017-01-27	16.04		1
2017-02-02	16.25	1
2017-02-08	16.18		1
2017-02-20	11.05		1
2017-02-26	17.61		1
2017-03-04	31.84	1
2017-04-15	17.8	1
2017-04-21	17.8		1
2017-04-27	25.43	1
2017-05-03	16.81		1
2017-05-09	33.22	1
2017-05-27	19.33		1
2017-07-02	33.39	1
2017-07-08	35.58		1
2017-08-13	18.53	1
2017-08-31	11.75	1
2017-09-06	45.36	1
2017-09-12	20.3	1
2017-09-18	21.15		1
2017-09-24	17.52	1
2017-09-30	30		1
2017-10-06	10.96	1
2017-10-12	19.22	1
2018-01-10	76.25		1
2018-01-16	22.28		1
2018-01-22	22.42	1
2018-01-28	38.89		1
2018-02-09	54.12		1
2018-02-15	56.95		1
2018-02-21	26.19	1
2018-02-27	21.89		1
2018-03-05	13.09	1
2018-03-23	27.83	1
2018-03-29	29.94		1
2018-04-04	48.84	1
2018-04-10	56.61		1
2018-04-22	50.33		1
2018-04-28	34.81	1
2018-06-09	24.43	1
2018-06-15	47.7		1
2018-06-21	60.76	1
2018-07-27	67.89		1
2018-08-02	73.12	1
2018-12-12	125.14		1
2018-12-18	91.23	1
2018-12-24	67.9		1
2019-01-05	100.09		1
2019-01-11	69.55	1
2019-01-17	51.89		1
2019-02-04	132.82		1
2019-02-10	60.12	1
2019-03-18	19.27		1
2019-03-24	67.47	1
2019-04-29	23.74		1
2019-05-05	19.3	1
2019-05-23	84.44		1
2019-11-01	32.64		1
2019-11-07	19.31	1
2019-11-13	23.74		1
2020-02-23	20.56		1
2020-12-19	17.34	1
2020-12-25	30.4		1
2021-01-06	46.11	1
2021-01-24	41.07		1
2021-01-30	11.02		1
2021-02-05	57.98	1
2021-02-11	20.11		1
2021-02-17	10.52	1
2021-02-23	9.58		1
2021-03-01	12.9	1
2021-03-19	12.21	1
2021-04-30	20.6		1
2023-02-01	17.13		1
