# Supplementary material for: Ephemeral grounding on the Pine Island Ice Shelf, West Antarctica, from 2014–2023
Source: Copernicus journal article supplement (doi:10.5194/tc-20-245-2026), 2026-01-15
Supplement: Supplementary file [file tc-20-245-2026-supplement-title-page.pdf › tc-20-245-2026-supplement-title-page.pdf]

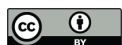

*Supplement of*

**Ephemeral grounding on the Pine Island Ice Shelf, West Antarctica, from 2014–2023**

**Yite Chien et al.**

*Correspondence to:* Chunxia Zhou (zhoucx@whu.edu.cn)

- tc-20-245-2026-supplement-title-page.pdf
- egusphere-2025-603-supplement-version3
  - Table\_S1.xlsx
  - Table\_S2.xlsx

The copyright of individual parts of the supplement might differ from the article licence.
